# Supplementary material for: Gene refashioning through innovative shifting of reading frames in mosses
Source: PubMed Central journal article supplement (PMC5908804; doi:10.1038/s41467-018-04025-x), 2018-04-19
Supplement: 41467_2018_4025_MOESM1_ESM.pdf [file 41467_2018_4025_MOESM1_ESM.pdf]

**Supplementary information  
for Guan et al.**

**Gene refashioning through innovative shifting of reading frames in mosses**

a

| Organism                                       | Blast Name     | Score | Number of Hits | Description                                 |
|------------------------------------------------|----------------|-------|----------------|---------------------------------------------|
| cellular organisms                             |                |       | 1688           |                                             |
| • Eukaryota                                    | eukaryotes     |       | 997            |                                             |
| • • Viridiplantae                              | green plants   |       | 10             |                                             |
| • • • Embryophyta                              | land plants    |       | 8              |                                             |
| • • • • Marchantia polymorpha subsp. ruderalis | liverworts     | 246   | 1              | Marchantia polymorpha subsp. ruderalis hits |
| • • • • Selaginella moellendorffii             | club-mosses    | 230   | 4              | Selaginella moellendorffii hits             |
| • • • • Physcomitrella patens                  | mosses         | 196   | 1              | Physcomitrella patens hits                  |
| • • • • Quercus suber                          | eudicots       | 107   | 2              | Quercus suber hits                          |
| • • • • Monoraphidium neglectum                | green algae    | 90.1  | 2              | Monoraphidium neglectum hits                |
| • • Sordaria macrospora k-hell                 | ascmycetes     | 157   | 2              | Sordaria macrospora k-hell hits             |
| • • Phellinus noxius                           | basidiomycetes | 152   | 1              | Phellinus noxius hits                       |
| • • Thielavia terrestris NRRL 8126             | ascmycetes     | 150   | 2              | Thielavia terrestris NRRL 8126 hits         |
| • • Spizellomyces punctatus DAOM BR117         | chytrids       | 148   | 6              | Spizellomyces punctatus DAOM BR117 hits     |
| • • Madurella mycetomatis                      | ascmycetes     | 147   | 2              | Madurella mycetomatis hits                  |
| • • Hydromenulus pinastri MD-312               | basidiomycetes | 146   | 2              | Hydromenulus pinastri MD-312 hits           |
| • • Neurospora tetrasperma FGSC 2508           | ascmycetes     | 146   | 2              | Neurospora tetrasperma FGSC 2508 hits       |
| • • Neurospora tetrasperma FGSC 2509           | ascmycetes     | 146   | 1              | Neurospora tetrasperma FGSC 2509 hits       |
| • • Exophiala spinifera                        | ascmycetes     | 146   | 2              | Exophiala spinifera hits                    |
| • • Neurospora crassa OR74A                    | ascmycetes     | 145   | 2              | Neurospora crassa OR74A hits                |
| • • Neurospora crassa                          | ascmycetes     | 145   | 1              | Neurospora crassa hits                      |
| • • Rhizopogon vinicolor AM-OR11-026           | basidiomycetes | 144   | 1              | Rhizopogon vinicolor AM-OR11-026 hits       |
| • • Saitoella complicata NRRL Y-17804          | ascmycetes     | 145   | 4              | Saitoella complicata NRRL Y-17804 hits      |
| • • Rhizopogon vesiculosus                     | basidiomycetes | 144   | 1              | Rhizopogon vesiculosus hits                 |
| • • Tulasnella calospora MUT 4182              | basidiomycetes | 144   | 2              | Tulasnella calospora MUT 4182 hits          |
| • • Ramazzottilus varieomatus                  | tardigrades    | 144   | 3              | Ramazzottilus varieomatus hits              |
| • • Chaetomium globosum CBS 148.51             | ascmycetes     | 142   | 2              | Chaetomium globosum CBS 148.51 hits         |
| • • Pisolithus microcarpus 441                 | basidiomycetes | 142   | 1              | Pisolithus microcarpus 441 hits             |
| • • Fomitiporia mediterranea MF3/22            | basidiomycetes | 142   | 2              | Fomitiporia mediterranea MF3/22 hits        |
| • • Kwoniella heveanensis BCC8398              | basidiomycetes | 141   | 1              | Kwoniella heveanensis BCC8398 hits          |
| • • Kwoniella heveanensis CBS 569              | basidiomycetes | 141   | 1              | Kwoniella heveanensis CBS 569 hits          |
| • • Paxillus involutus ATCC 200175             | basidiomycetes | 141   | 1              | Paxillus involutus ATCC 200175 hits         |

b

| Organism                                    | Blast Name          | Score | Number of Hits | Description                                  |
|---------------------------------------------|---------------------|-------|----------------|----------------------------------------------|
| cellular organisms                          |                     |       | 1727           |                                              |
| • Eukaryota                                 | eukaryotes          |       | 718            |                                              |
| • • Viridiplantae                           | green plants        |       | 18             |                                              |
| • • • Chlorophyceae                         | green algae         |       | 11             |                                              |
| • • • • Monoraphidium neglectum             | green algae         | 544   | 6              | Monoraphidium neglectum hits                 |
| • • • • Gonium pectorale                    | green algae         | 118   | 1              | Gonium pectorale hits                        |
| • • • • Tetrabaena socialis                 | green algae         | 114   | 1              | Tetrabaena socialis hits                     |
| • • • • Chlamydomonas reinhardtii           | green algae         | 110   | 1              | Chlamydomonas reinhardtii hits               |
| • • • • Volvox carteri f. nagariensis       | green algae         | 107   | 2              | Volvox carteri f. nagariensis hits           |
| • • • Selaginella moellendorffii            | club-mosses         | 93.1  | 4              | Selaginella moellendorffii hits              |
| • • • Quercus suber                         | eudicots            | 91.9  | 2              | Quercus suber hits                           |
| • • • Physcomitrella patens                 | mosses              | 83.4  | 1              | Physcomitrella patens hits                   |
| • • Colletotrichum chlorophyti              | ascmycetes          | 120   | 1              | Colletotrichum chlorophyti hits              |
| • • Coniochaeta lignaria NRRL 30616         | ascmycetes          | 120   | 1              | Coniochaeta lignaria NRRL 30616 hits         |
| • • Colletotrichum orbiculare MAFF 240422   | ascmycetes          | 117   | 1              | Colletotrichum orbiculare MAFF 240422 hits   |
| • • Allomyces macrogynus ATCC 38327         | blastocladiomycetes | 116   | 2              | Allomyces macrogynus ATCC 38327 hits         |
| • • Trichoderma reesei QM6a                 | ascmycetes          | 115   | 4              | Trichoderma reesei QM6a hits                 |
| • • Trichoderma reesei RUT C-30             | ascmycetes          | 115   | 2              | Trichoderma reesei RUT C-30 hits             |
| • • Trichoderma parareesei                  | ascmycetes          | 114   | 2              | Trichoderma parareesei hits                  |
| • • Coniosporium apollinis CBS 100218       | ascmycetes          | 111   | 2              | Coniosporium apollinis CBS 100218 hits       |
| • • Podospora anserina S mat+               | ascmycetes          | 110   | 9              | Podospora anserina S mat+ hits               |
| • • Hypoxylon sp. EC38                      | ascmycetes          | 110   | 3              | Hypoxylon sp. EC38 hits                      |
| • • Pyrenema omphalodes CBS 100304          | ascmycetes          | 110   | 1              | Pyrenema omphalodes CBS 100304 hits          |
| • • Fusarium pseudograminearum CS3096       | ascmycetes          | 109   | 2              | Fusarium pseudograminearum CS3096 hits       |
| • • Fusarium pseudograminearum CS3220       | ascmycetes          | 109   | 1              | Fusarium pseudograminearum CS3220 hits       |
| • • Fusarium pseudograminearum CS3427       | ascmycetes          | 109   | 1              | Fusarium pseudograminearum CS3427 hits       |
| • • Fusarium pseudograminearum CS3487       | ascmycetes          | 109   | 1              | Fusarium pseudograminearum CS3487 hits       |
| • • Elaphomyces granulatus                  | ascmycetes          | 113   | 1              | Elaphomyces granulatus hits                  |
| • • Spizellomyces punctatus DAOM BR117      | chytrids            | 108   | 6              | Spizellomyces punctatus DAOM BR117 hits      |
| • • Fusarium oxysporum f. sp. melonis 26406 | ascmycetes          | 107   | 7              | Fusarium oxysporum f. sp. melonis 26406 hits |
| • • Schizosaccharomyces pombe               | ascmycetes          | 107   | 2              | Schizosaccharomyces pombe hits               |
| • • Schizosaccharomyces pombe 972h-         | ascmycetes          | 107   | 1              | Schizosaccharomyces pombe 972h- hits         |

**Supplementary Figure 1. (a)** Partial taxonomy distribution generated from BLAST search of the NCBI non-redundant (*nr*) protein sequence database using hemerythrin from *Marchantia polymorpha* (JGI ID: Mapoly0042s0056.1). Hits from only one green alga *Monoraphidium neglectum* were found. **(b)** Partial taxonomy distribution generated from BLAST search of *nr* database using the *Monoraphidium* sequence identified above, indicating all green algal hits were from Chlorophyceae. In both searches, E-value = 1e-8 was used as cutoff; land plant and algal hemerythrin sequences were more similar to fungal homologs than to each other.

**a**

hypothetical protein M407DRAFT\_241621 [Tulasnella calospora MUT 4182]  
Sequence ID: [KIO31868.1](#) Length: 224 Number of Matches: 1

Range 1: 41 to 156 [GenPept](#) [Graphics](#) ▼ Next Match ▲ Pr

| Score          | Expect                                                         | Method                       | Identities  | Positives   | Gaps      |
|----------------|----------------------------------------------------------------|------------------------------|-------------|-------------|-----------|
| 95.4 bits(310) | 2e-22                                                          | Compositional matrix adjust. | 55/120(46%) | 75/120(62%) | 7/120(5%) |
| Query 2        | IILEVKHDHAELEECFQRYKKAHSGQDHEARNLNFQVWEISRHSVSEELILYPMDL-      | 60                           |             |             |           |
|                | I E+ +DH ELEE + Y+ A S + E NQF WE++RHSV EEL+LYP +              |                              |             |             |           |
| Sbjct 41       | ISEEITQDHRLEEEYGNRYRTATS---EKEKTQWANQFCWELARHSVGEELVLYPAFEKH   | 97                           |             |             |           |
| Query 61       | LGDRGKELADQSREDHHRKTEILAEELQTI--SDPSLFEKRLNIMMAELRDHMKMEEEEEDL | 118                          |             |             |           |
|                | LG GK++AD R +H K++L EL+ ++DP+ F L +M ELR+HMK EEE DL            |                              |             |             |           |
| Sbjct 98       | LGPEGKIADTDRAEHLEAKLLYELEGTHTVNDPN-FPTILKKLMEELREHMKSEENDL     | 156                          |             |             |           |

**b**

putative hemerythrin-like protein [Monoraphidium neglectum]  
Sequence ID: [XP\\_013901669.1](#) Length: 253 Number of Matches: 1  
[▶ See 1 more title\(s\)](#)

Range 1: 75 to 192 [GenPept](#) [Graphics](#) ▼ Next Match ▲ f

| Score          | Expect                                                          | Method                       | Identities  | Positives   | Gaps      |
|----------------|-----------------------------------------------------------------|------------------------------|-------------|-------------|-----------|
| 45.6 bits(140) | 0.002                                                           | Compositional matrix adjust. | 38/123(31%) | 68/123(55%) | 7/123(5%) |
| Query 1        | DIILEVKHDHAELEECFQRYKKAHSGQDHEAR-NLNFQVWEISRHSVSEELILYPMD       | 59                           |             |             |           |
|                | +I+ + DH L F + +G H+ R +L +Q+V +++ HS+SEE +LYP                  |                              |             |             |           |
| Sbjct 75       | NIVDAITDDHKRL---FSYCDQLRGQGLGHDQREHLRHQLVHDLAVHSLSEEEVLYPA--    | 129                          |             |             |           |
| Query 60       | LLGDRGKELADQSREDHHRKTEILAEELQTI--SDPSLFEKRLNIMMAELRDHMKMEEEEEDL | 118                          |             |             |           |
|                | L G E+ ++ ++H K IL ++ + +D F RL+ ++ ELR H++ EEE+ L              |                              |             |             |           |
| Sbjct 130      | LKNACGNEMRNHVLDHEHTLKHILMDIDKMDADDPNPNRDLDELVHELRHHVQEEEEKVL    | 189                          |             |             |           |
| Query 119      | AYL 121                                                         |                              |             |             |           |
|                | + 121                                                           |                              |             |             |           |
| Sbjct 190      | PMF 192                                                         |                              |             |             |           |

**c**

```
>ConsensusfromContig38372-abinit-gene-0.1
Length = 182

Score = 44.3 bits (103), Expect = 8e-06, Method: Compositional matrix adjust.
Identities = 34/115 (29%), Positives = 64/115 (55%), Gaps = 7/115 (6%)

Query: 6 VKHDHAELEECFQRYKKAHSGQDHEARNLNFQVWEISRHSVSEELILYPMDLLGDRG 65
++ DH+ ++E + R+K SK + + R NQF+ ++S+HSV+EE++ YP ++ G
Sbjct: 43 LQKDHSFIKEDYNRWKA--SKNAEEKIR-WANQFILDVSQHSVAEEIYVYPEIEKRQKGG 99

Query: 66 KELADQSREDHHRKTEILAEELQTI--SDPSLFEKRLNIMMAELRDHMKMEEEEEDL 118
+ ++H K +L L + +DP ++ L + + L+ H+K EEE D
Sbjct: 100 SISKQKHLDEHQEVKNMLYNLDRMNYTDPG-YDALLERIYSALQ-HIKDEEENDF 152
```

**Supplementary Figure 2.** Land plant hemerythrins are more similar to fungal homologs than to those from chlorophyte green algae and glaucophytes. Figures show pairwise comparisons of the conserved HHE domain between liverwort *Marchantia polymorpha* (Mapoly0042s0093.1) and homologs from fungi, chlorophytes, and glaucophytes, respectively. Fungal and green algal sequences here are top hits from BLASTP search of nr database. **(a)** Sequence alignment between *Marchantia polymorpha* and the fungus *Tulasnella calospora*. **(b)** Sequence alignment between *Marchantia polymorpha* and chlorophyte *Monoraphidium neglectum*. **(c)** Sequence alignment between *Marchantia polymorpha* and the glaucophyte *Cyanophora paradoxa*.

**a**

>Partial sequence of the *Isoete yunguiensis* mosaic gene derived from fusion of oleosin and Hr

```
CCTCTCGGATGCTGGGGACGAGCCTAACCATAGGAACCTAATTCTGGTAATATCTTCGCCGTGTACTCCTTTTTAGCCCAATTCTAGTACC
TCTAGGGTTTGTGCTTTTCATGGCCCGGCAGCCTTCGCGGCTATGGTGGCAGCAGGCAACGCAGTGGCATGGATCTACCGCTACAAAAAAGG
CCGCCACCCCATGGGATCCGATAAACTTGATGCAGCAATCCACATGTTTCATACCCAGAAGAGATATCATCGACCTCGTTAGGGAGGATCATGC
TAAACTGGAAGAGGATTACGGTAATTACAAGAGCGCCAGCCGTAGAGGAGACACTACGAGGCCAGAAAATGGTTCAACCAGTTTGTGTGGG
AAATTTCCAGACATTCTGTCTCCGAAGAGCTTGTATGTATCCCTCCTTGATGGGCTGGGCCAAAAGGCCGAGATTTGGCATATCAATCCCG
TGCAGATCATACAAGATCAAGGAATTGCTCACGGAATTGCAGCACAACTGATTCTGAGGATTTGATTCCAGAATGGAGACCATGATGTC
CAATCTCAGAGACCATAATTAAGTTGGAAGAAAAGCGCGATGGAGATCTGGCTTGTGGTGGATAATATGGATCAGCAGGCTCGCGAGGCTGC
CGGAGCTACATTTGCACTGGGCAAGAATCT
```

>Translated peptide sequence of the *Isoete yunguiensis* mosaic gene

```
PLAMLGTSLTIGTLILVISSPLLLLFSPILVPLGFVLFMAAAFAAMVAAGNAVAVIYRYKKGRHPMGS DK
LDAAIHMFIPRRDIIDLVRDHAKLEEDYGNYKASRRGDHYEARKWFNQFVWEISRHSVSEELVMYPLL
DGLGPKGRDLAYQSRADHHKIKELLETQLHNTDSEDFDSRMETMMSNLRDHIKLEEKRDGDLACL RD
NMDQQAREAAAGATFALGKN
```

**b**

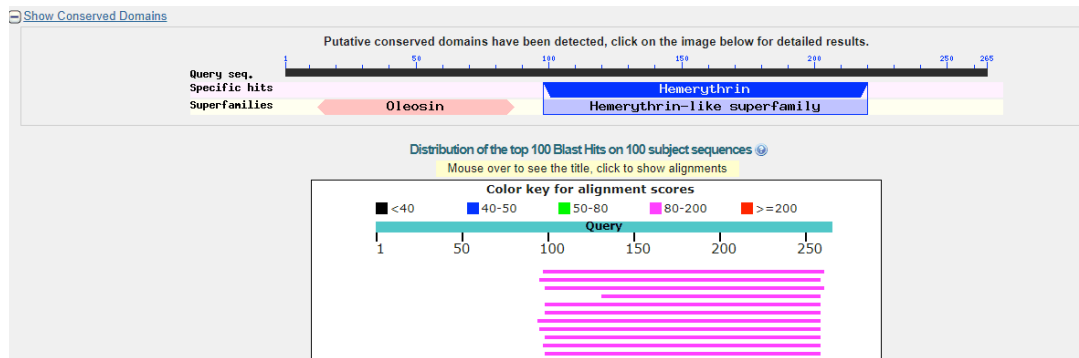

**Supplementary Figure 3. (a)** Partial nucleotide sequence and translated peptide sequence of the *oleosin* and *Hr* mosaic gene in the lycophyte *Isoetes yunguiensis* (GenBank accession number MG254883). **(b)** CDD comparison with *I. yunguiensis* protein sequence, indicating fusion of oleosin and HHE domain. Although the same gene fusion was also found in the liverwort *Treubia lacunosa* (1KP ID: FITN-2089742), its nucleotide sequence shared 100% identity with PYHZ-2006808, pointing to a possibility of contamination.

a

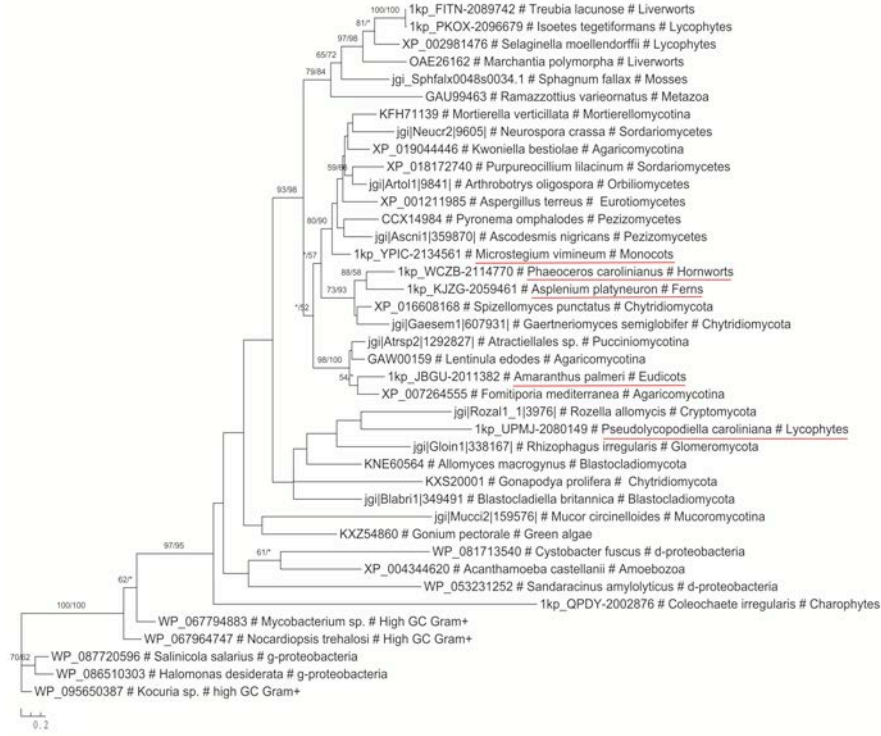

b

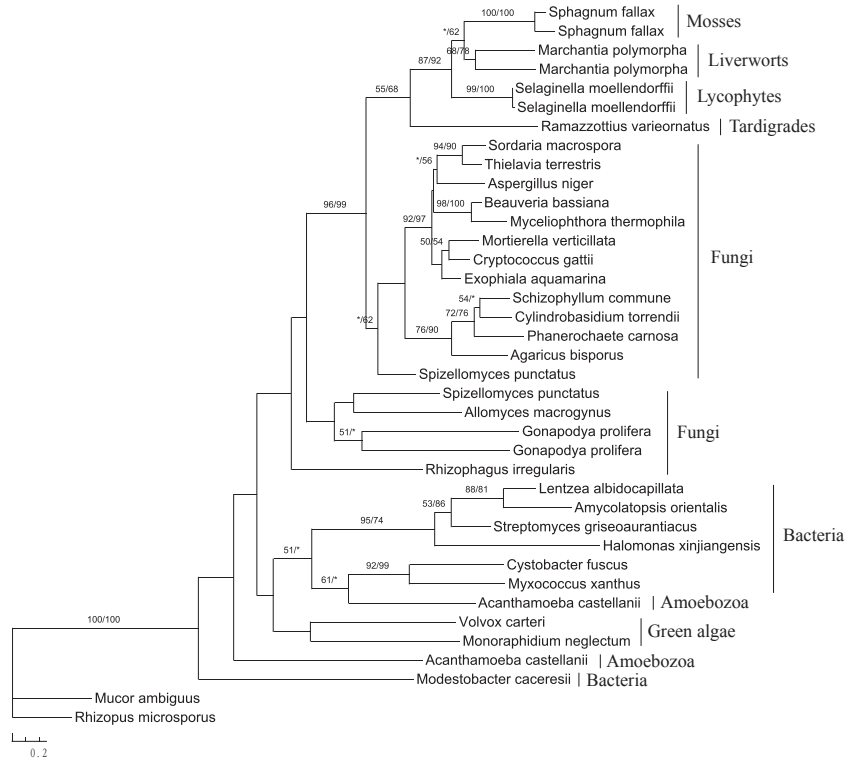

**Supplementary Figure 4.** Molecular phylogeny of hemerythrin (Hr) protein sequences. LG and JTT substitution models were used in maximum and distance analyses, respectively, and four-gamma rate categories plus invariant sites were used in the analyses. Numbers above branches show bootstrap values from maximum likelihood and distance analyses, respectively. Asterisks indicate values lower than 50%. Nodes without values indicate that bootstrap support values from both analyses are lower than 50%. Taxonomic affiliations are after species names. **(a)** Phylogenetic analyses with a larger taxonomic sampling, including multiple angiosperm and seedless vascular plant sequences from 1KP (underlined in red). **(b)** Phylogenetic analyses with sequences of known scaffold information, mostly from genome sequence projects. The sequence of glaucophyte *Cyanophora paradoxa* was removed from the analyses because of its much shorter length. Inclusion of the *Cyanophora* sequence provided a similar topology, with much lower branch support values.

>Chr21: 12755680..12757359

12757359 cgeatgctcagcacctgtcgagcacagcccgtaccagtcacgtcctcctcccaatccacctttcgectcctgcttcaatc

12757279 tttctctcatccaagtgc M Y N M C S L G R S P P Y I N Q N P F C L  
ATGTATAATATGTGCAGCCTCGGTGATCACCCCGTATATCAATCAGAACCCGTTCTGCTT

12757199 C T L S D L Q P L Y H S L S V I L Y I T H K A L V V H  
TGCACACTATCAGATTGCAACCTCTCTATCACTCTCTTAGTGAATCTATATCACTCACAAAGCTCTAGTTGTACA

12757119 R E A E A L L P A D H T V H H G R S R I H P L E R C R  
CCGTGAAGCCGAAGCACTTCTCCAGCAGATCACACTGTCCACCATGGCCGAGTCGCATACATCCCCTTGAGCGCTGTC  
m a a v a y i p l s a v

12757039 F R E V G N H P S Q L Q Q C G L P A Q R G H C C V Q  
GCTTCCGCGAGGTGGCAACCACCAAGCCAGCTCCAGCAATGCGGCCCTCCAGCCGAGCGGGCATTGTTGCGTTCA  
a s a r l a t t q a s s s n a a s q p s a g i v a f k

12756959 A S C H A I L P A  
GCGAGCTGTACGCCATCTTGCCGTGTACTGAACCCGTCCTCGGGGCTTGTTCGTTGTGAGGATTGTCCCGCGGGTC  
r a v t p s c l

12756879 GATTGGATGGCATGTGAACAAGTGTAGTGGCATTGCTGAGCTCGGAACCAAGTCCATGGCGAGCATGGGTGTGGTTCT

12756799 GAGCTGAGCAGGAAGTGGGACGTGA AATTGGCCGCGCCAGGGAGTGTGGGCTTGTGCAATTGTGGGTGTTGAGAG

12756719 CGATGACAATGGATGTTTGGTCTCTAACGTGAAAAACATGTTGTGCTGGATCGCAG V G E P V L R  
CAGTCGGCGAGCCAGTTCGCG  
s a s q f c g

12756639 R P R H F L Q Q Q Q Q Q P G R E  
GGTCCCGCTCACTTCTCCAACAGCAGCAGCAGCAGCAGCTGGTCGAGGTAAAGTGCATCCATGTCTACCGCGCGTGT  
v p v t f s n s s s s s l v e v s a s m s t a r v

12756559 GGCAGTGTGCCTCCATGTCGATCGCAAGAGTGGTGGTTTGTGTTTGGTTCGACTTGC GCGCGCAATCGTGACGTGGT  
g q c a s m s i a r g g g f v l v d l r a a i v t w w

12756479 GATGAGTGTGGGTGGGAATTGCGCGGTTCTTCCAGCTGGGCACAGCTAATGCATTTGGGGGGGAGGGGGGAGGGGGG  
m s v g g n c a v l p a g h s \*

12756399 E T G R V D Q M L R H S E E F G G G  
GGGGTGGGGATGGGTTGAGCAG AGGAAACAGGGCGGTGATCAGATGCTCCGCCACTCAGAAAGTGTGAGGTGG

12756319 R R H H R Q S E A G P Q G A G G V L Q L Q E V P Q A  
GCGCCGACATCATGCAAAGTGAAGCAGGACCACAAGGAGCTGGAGGCGTACTCCAATTACAAGAAGTTCACAAAG

12756239 G Q R G R G R I M V Q P V R V G D L S P C R H R G A  
CAGGGCAACGAGGAAGAGCCGGATAATGGTTCAACCAGTTCGTGTGGAGATCTCTCGCCATGCCGTACCCGAGGAGCT

\*

12756159 G V V P V D R V A G R Q G P E A G G P V A R R A P E D  
GGTGTGTACCCGTTGATCGCGTCGACGGCGACAAGGCCAGAAGCTGGCGGACCAGTCGCGGACGAGCAGCAGAAGA

12756079 E G H A G G D P G H R G R R P V \*  
CGAAGGACATGCTGGTGGAGATCCAGGGCATCGAGGACGACCTGTTTGAGAGAAGTTCGACGCCATCATGGACGTG

12755999 CTGCGAGACAGTGC AAAAGGAGTCCGAGGATCTGGAGTACTTGAGGCAGAACGTGGACCAGCCCGCGGAGGC

12755919 AGCGGGAACCATTCGCGTGGCAAGAACATCGTCCGACGAAGCCCATCGCGCAGTGCCGAACAGGTCCGGGATAG

12755839 TGGAGGCGCGCTGGGCTGTTCGCGACTCCCTGGACAAGTGC GCGCAGTGTTCAGCCGTATCCCAAGGACAAGT

12755759 agggcaattttagctttttgtacatcagccccccgtcccgcgagtttgttgtgcaaataggtggctccgggatggat

ATCG *YAN*

ATCG *AltYAN*

ATCG *Hr*

**Supplementary Figure 5.** Sequences of *YAN*, *AltYAN*, and *Hr*. Black boxes indicate exons of *YAN*. Red letters show exons of *AltYAN*. Blue letters show the pseudogenized *Hr* region. Capital letters above the nucleotide sequences indicate the amino acids encoded by *YAN*, while lowercase letters below indicate those encoded by *AltYAN*.



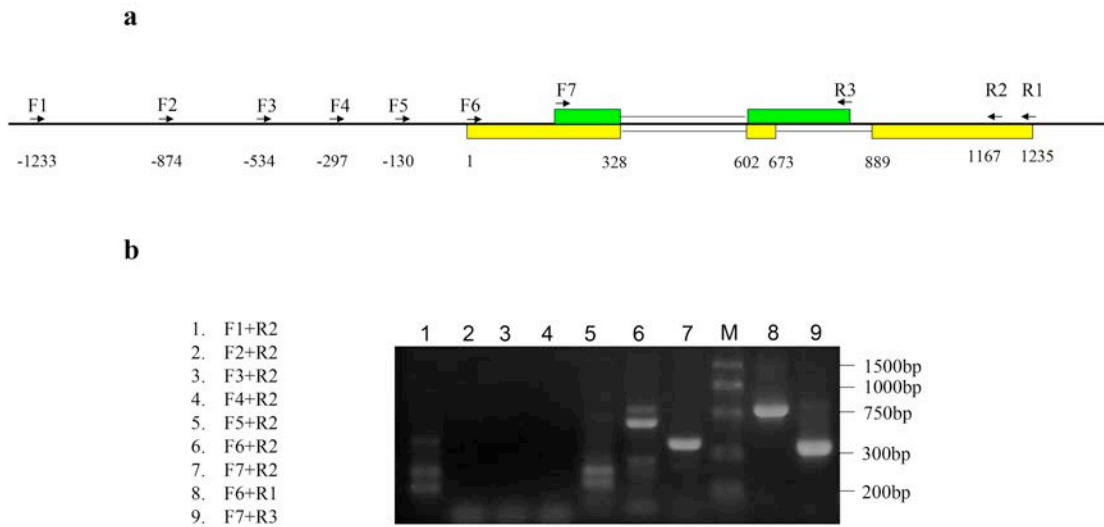

**Supplementary Figure 6.** RT-PCR confirmation of *YAN*, *AltYAN*, and *Hr*. **(a)** Schematic diagram of primers. To confirm the mRNA completeness of this locus, seven forward primers were designed, with F1-F5 annealing to the upstream and F6-F7 annealing to exons. Each forward primer cooperated with a reverse primer R2 for RT-PCR reactions. To further confirm the CDS sequences of *YAN* and *AltYAN*, two primer pairs, (F6, R1) and (F7, R3), were used to amplify the CDSs of *YAN* and *AltYAN*, respectively. Amplified CDSs were then sequenced. **(b)** Gel result of RT-PCR. F1-F5 cooperating with R2 failed to amplify the appropriate product, but F6 and F7 cooperating with R2 could amplify the appropriate product. The lengths of *YAN* and *AltYAN* CDS sequences were correct.

a

>Physcomitrium sp. YAN and Hr annotation

M Y N M C S L G R S P P Y I N Q N S F C L

C T C A T C C A C C G T G C A T G T A T A A T A T G T G C A G C C T C G G T C G A T C A C C C C C G T A C A T C A A C C A G A A C T C G T T C T G C T T

C T L S D L Q P L Y H S L S V I L Y I T H K A L V

G T G C A C A T A T C A G A T T T G C A A C C T C T C T A T A C T C G C T C A G T G T A A T T C T A T A T A T A C T C A C A A A G C T C T A G T

V H R E A E A L L P A D H T V H H G R S R I H P

T G T A C C C G T G A A G C C G A A G C A C T T C C C A G C A G A T C A C A C T G T C C A C C A T G G C C G C A G T C G C A T A C A T C C

m a a v a y i

L E R C R S R E V G N H P S Q L Q Q C G L P A Q

C C T T G A G C G C T G T C G C T C C C G C G A G G T T G G C A A C C A C C C A A G C C A G C T C C A G C A A T G C G G C C T C C C A G C C A

p l s a v a p a r l a t t q a s s s n a a s q p

C G H C C V Q A S C H A I L P

G T G C G G C A T T G T G C G T T C A A G C G A G T G C C A C G C C A T C T T G C C T G

s a g i v a f k r a a t p s c l

A V G E P V L R R P R H F L Q Q Q Q Q Q Q P G R

C A G T C G G C G A G C C A G T T C T G C G C G T C C C C G T C A C T T T C C A A C A G C A G C A G C A G C A G C A G C C T G T G T C G A G

q s a s q f c g v p v t f s n s s s s s s s l v e

E E T G R V D Q M L R H S E E F G G G R R H H R

A G G A A C A G G G C G G T C G A T C A G A T G T C C G C C A C T C A G A A G A G T T T G G A G T T G G C G C C G A C A T A C T G A C

r k q g g s i r c s a t q k s l e v g a d i i d

Q S E A G P Q G A G G G V L Q L Q E V P Q A G Q

A A A G T G A A G C A G G A C C A A G G A G C T G G A G G A G C G T A C C A A T T A C A A G A A G T T C C A A A G C A G G C C A

k v k q d h k e l e e a y s n y k k f h k q g n

R G R G R K M V Q P V R V G D L A P C R H R G A

C G A G G A A G A G G C C G A A A T G G T T C A A C C A G T T C G T G T G G A G A T C T C G C G C C A T G C C G T C A C C G A G G A G C T

e e e a g k w f n q f v w e i s r h a v t e l

G V V P V D R V A G R Q G P E A G G P V A R R A

G G T G T T G T A C C G T T G A T C G C G T C G C A G G G C A C A A G G C C A G A A G C T G G C G G A C C A G T C G C G C G A C G A G C

v l y p l i a s q g d k g q k l a d q s r d e

P E D E G H A G G D P G H R G R R P V \*

A C C A G A A G C A A G G A C A T G C T G T G G A G C A T C A G G A C C A T C G A G G A C C A C T T G T T G A G A A G A A G T T C

h q k t k d m l v e i q g i e d d d l f e k k f

G A C G C A A T C A T G A C T G C T G C G A G A C A C T G C A A A A G G A G A G T C G G A G A T C T G G A G T A C T T G A G G C A

d a i m d v l r e h v q k e e s e d l e y l r q

G A A C G T G G A A C A G C A G C C G C G A G G C A C C A C A T T C G C G T G G G C A A G A A C A T C G T C C C G A C G A

n v e q a a r e a a g t t f a l g k n i v p t

A G C C C A T G C G C A G T G C C G A A C A G T C G C G A T A G T G G A G G C C C T G G G C T G T T C G C A C T C C C T T G G

k p h a a v p n r s a i v e g a l g l f a t t p l

A C A A G T C G C G C A G T G T T C A C G C C T A T C C C A A G G A C A A C T A G A G G A C A A T T G T A G C T T T T G T A C A T C A

d k l r d v f t p y p k d n \*

ATCG YAV

ATCG Hr

b

1 10 20 30 40 50 60 70 80 90 100 110 120 130

Physcomitrium\_sp\_For  
SphFalx0048s0034\_1  
Consensus  
H A R V Y I P L S R A V P R L R A T T Q R S S N R A S Q P S A G I Y A F K R A R T P S L Q S R S Q F C G V P Y T F S N S S S S L V E R K Q G S T R C S A T Q S L E V G A D I T Q K Y V Q D I K E L E E R Y S N Y K F I K Q A E E E A G A F N O L  
H S H V T T T H V P G L M D I K H D I R E F E F Y T N Y K R A Y A N H A D E K E K A F N O L  
r c S a t q k s h e V g a D i l D e l K q D h r E L E E A Y a N Y K r a h a a G e E e E k A F N O L

131 140 150 160 170 180 190 200 210 220 230 240 250 260

Physcomitrium\_sp\_For  
SphFalx0048s0034\_1  
Consensus  
V H E I S R A H V T E E L V Y P L I S A G D K G K L A D S R D E H K T K D M L V E T G E I D D D L F E K F D R I H V L R E H V Q K E E S E D L E Y L R O N V G Q A R E A A G T T F A L G K L V P T K P H A V P N R S A I V E G A L G L F A T P  
V H E I S R A H V G E E L V Y P L L D H A G P E K E H A D K I R H A H Q K V K L E E I A K L S D P G L F E A T L D R I H D L R Q H T N K E E T Q D L E Y L K H D I K S L E N H A F K Y G K A N P T R P H G P M R S A L E H A L H F V Y T P  
V H E I S R A H V G E E L V Y P L I A a a G d e G e 3 H D q d R a H Q K C K d e L o E T q r 1 e D d L F a k 1 D a I n k d L R W H # K E E # D L E Y L R Q n a k q a a r E a f a k a f a l G k n i a P T r P h a a I P W R S a l E a n l a I f a T P

261 270 280 289

Physcomitrium\_sp\_For  
SphFalx0048s0034\_1  
Consensus  
L K L R D V F T P Y P K D N  
L K L R D H F T P P K E L H V P Y Q P K Q E E R A K K  
L K L R D H F T P P K # # . . . . .

c

1 10 20 30 40 50 60 70 80 90 100 110 120 130

Physcomitrium\_sp  
Pp3c21\_19720V3.2  
Consensus  
H Y N C S L G R S P P Y I N Q N S F C L  
H Y N C S L G R S P P Y I N Q N F C L C T L S D L Q P L Y H S L S V I L Y T H K A L V Y H R E A L L P A D H T V H H G R S R I H P L E R C R S R E V G N H P S Q L Q Q C G L P A Q C G H C C V A S C H A I L P A V G E P V L R R P R H F L Q Q Q Q Q Q  
H Y N C S L G R S P P Y I N Q N F C L C T L S D L Q P L Y H S L S V I L Y T H K A L V Y H R E A L L P A D H T V H H G R S R I H P L E R C R F R E V G N H P S Q L Q Q C G L P A Q G H C C V A S C H A I L P A V G E P V L R R P R H F L Q Q Q Q Q Q

131 140 150 160 170 180 190 200 210 220 230 240 248

Physcomitrium\_sp  
Pp3c21\_19720V3.2  
Consensus  
P G R E E T G R V D Q L R H S E E F G G R R H R Q S E A G P G A G G G V L Q L Q E V P Q A G R G R G R I H Y Q P Y R Y G D L A P C R H R A G V Y P V D R V A G R Q G P E A G G P V A R R A P E D E G H A G G O P G H R G R P Y  
P G R E E T G R V D Q L R H S E E F G G R R H R Q S E A G P G A G G G V L Q L Q E V P Q A G R G R G R I H Y Q P Y R Y G D L S P C R H R A G V Y P V D R V A G R Q G P E A G G P V A R R A P E D E G H A G G O P G H R G R P Y  
P G R E E T G R V D Q L R H S E E F G G R R H R Q S E A G P G A G G G V L Q L Q E V P Q A G R G R G R I H Y Q P Y R Y G D L a P C R H R A G V Y P V D R V A G R Q G P E A G G P V A R R A P E D E G H A G G O P G H R G R P Y

**Supplementary Figure 7. (a)** Sequence and annotation of RT-PCR product of the HHE region in *Physcomitrium sp.* (GenBank accession number MG254884). Living materials were collected from Xiping, Yunnan, China. Amino acids encoded by the *Hr* gene are shown by lower case characters below the nucleotide sequence. Upper case characters above the nucleotide sequence indicate amino acids encoded by *YAN*. Boxes show exons of *YAN* (GenBank accession number MG254882). **(b)** Alignment of putative Hr protein sequences from *Physcomitrium sp.* and *Sphagnum fallax*. **(c)** Alignment of putative YAN protein sequences from *Physcomitrium sp.* and *Physcomitrella patens*.

**a**

```
>Physcomitrium sp. AltYAN annotation
ATGGCCGCAGTCGCATACATCCCCTTGAGCGCTGTCGCTCCC GCGAGGTTG
M A A V A Y I P L S A V A P A R L
GCAACCACCCAAGCCAGCTCCAGCAATGCGGCCTCCCAGCCCAGTGCGGGC
A T T Q A S S S N A A S Q P S A G
ATTGTTGCGTTCAAGCGAGCTGCCACGCCATCTTGCCTG
I V A F K R A A T P S C L

TCGGCGAGCCAGTTCTGCGGCGTCCCCGTCAC TTTCTCCAACAGCAGCAGC
S A S Q F C G V P V T F S N S S S
GGCAGCAGCCTGGTCGAGGTAAGTGCATCCATGTCCACCGCGTGTGCTGGG
G S S L V E V S A S M S T A C A G
CAGTGTGCCTCCATGTGATCGCCAGAGGTGGTGGTTTGT TTTGGTTCGAC
Q C A S M S I A R G G G F V L V D
TTGCGCGCCGAATCGTGACGTGGTGGATGA.....
L R A A I V T W W M
```

**b**

|                      |   |    |    |    |    |    |    |    |    |    |     |     |     |    |   |   |       |
|----------------------|---|----|----|----|----|----|----|----|----|----|-----|-----|-----|----|---|---|-------|
|                      | 1 | 10 | 20 | 30 | 40 | 50 | 60 | 70 | 80 | 90 | 100 | 110 | 120 | 22 |   |   |       |
| Physcomitrium_sp_Alt | M | A  | V  | A  | Y  | I  | P  | L  | S  | A  | V   | A   | P   | A  | R | L |       |
| Pp3c21_19720v3.1     | M | A  | V  | A  | Y  | I  | P  | L  | S  | A  | V   | A   | P   | A  | R | L |       |
| Consensus            | M | A  | V  | A  | Y  | I  | P  | L  | S  | A  | V   | A   | P   | A  | R | L | ..... |

**Supplementary Figure 8. (a)** Partial sequence and annotation of RT-PCR product of *AltYAN* in *Physcomitrium sp.* (GenBank accession number: MG254881). Primers specific to the *AltYAN* region were used for RT-PCR reactions. Living materials were collected from Xinping, Yunnan, China. Amino acids encoded by *AltYAN* are shown below the nucleotide sequence. **(b)** Alignment of putative *AltYAN* protein sequences from *Physcomitrium sp.* and *Physcomitrella patens*.

**a**

**FPKM Coefficient of variance: 3.342**  
(across samples below)

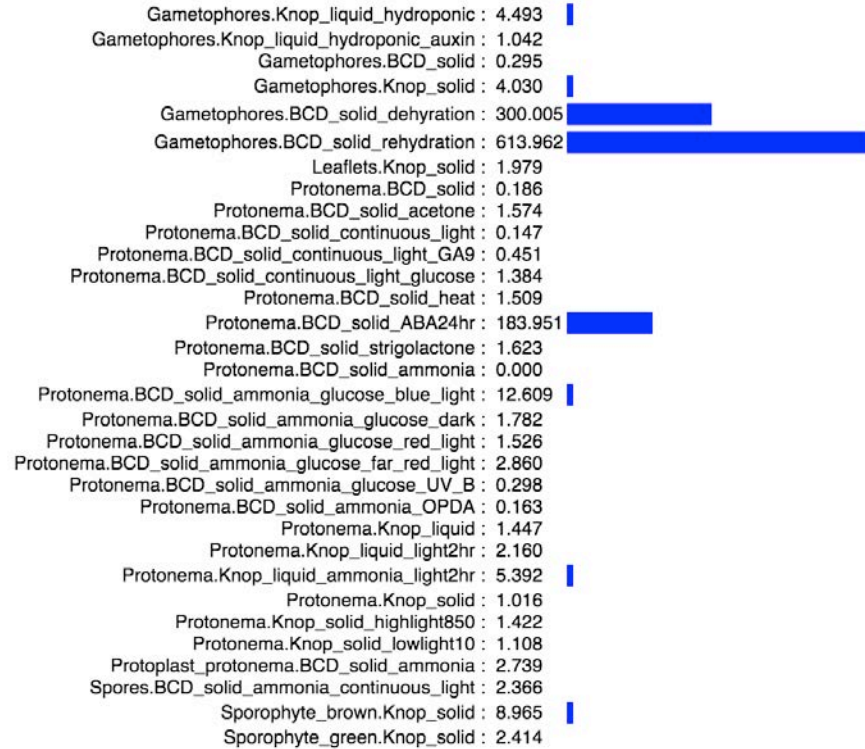

**Note:** FPKM from DESeq2 analysis.

**b**

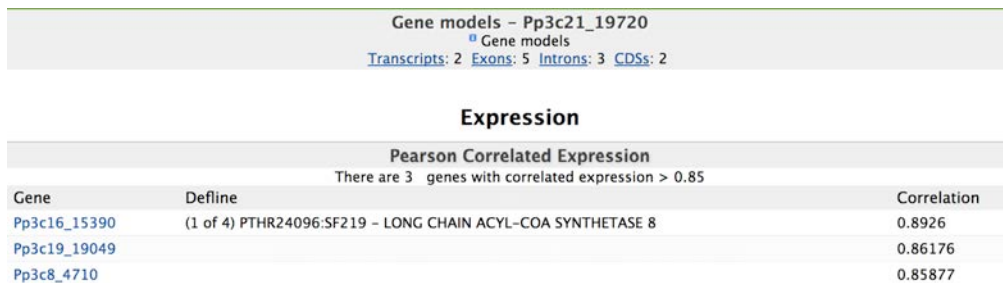

**Supplementary Figure 9.** Transcription data of *YAN/AltYAN* from Phytozome (<https://phytozome.jgi.doe.gov/phytomine/report.do?id=237468538>). **(a)** *YAN/AltYAN* is strongly induced by both dehydration and rehydration. **(b)** *YAN/AltYAN* is co-expressed with multiple other genes, including long-chain acyl-CoA synthetase 8 (*LACS 8*).

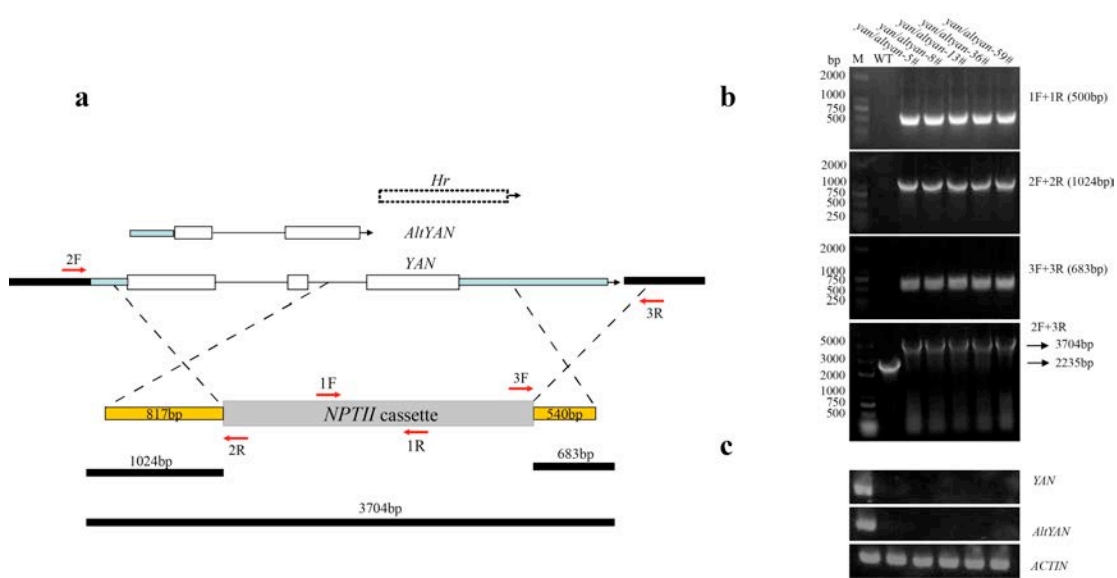

**Supplementary Figure 10.** Generation of *yan/altyan* knockout mutants and molecular identification. **(a)** Schematic diagram of *YAN/AltYAN* gene disruption construct. The positions of the primers used for PCR analyses of wild-type plants and mutants are indicated with arrows. **(b)** The transformants were tested by PCR on genomic DNA using primer pairs shown in schematic diagram. **(c)** *YAN* and *AltYAN* transcriptions were detected in wild-type plants and *yan/altyan* mutants using semi-quantitative RT-PCR. Primers specific to *ACTIN* were used as the control gene. As shown in the figure, *YAN* and *AltYAN* transcriptions were abolished in *yan/altyan* knockout mutants.

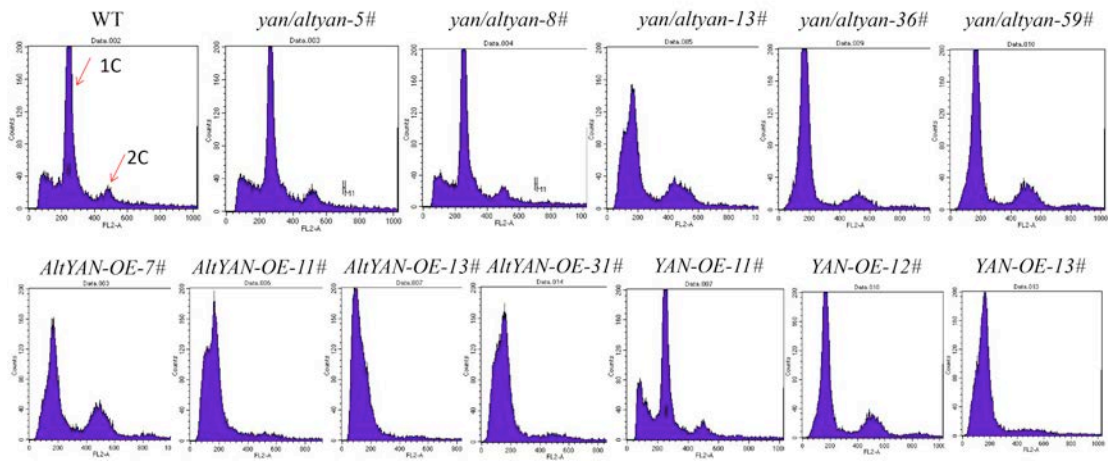

**Supplementary Figure 11.** Chromosome ploidy analyses. The chromosome ploidy of 2-week old plants was detected using flow cytometry.

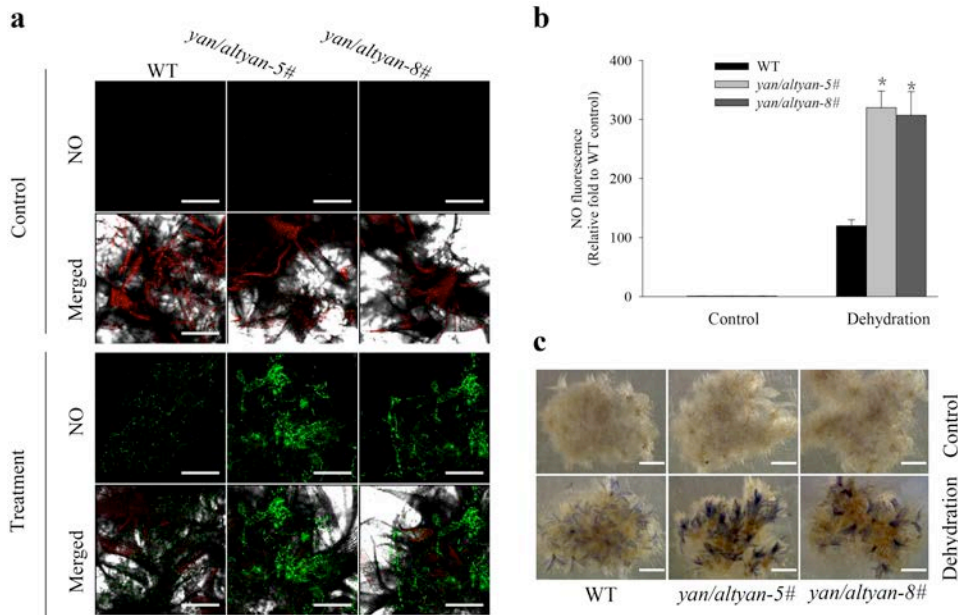

**Supplementary Figure 12.** Nitric oxide (NO) and superoxide anion accumulation in wild-type plants and *yan/alryan* knockout mutants. Two-week old *P. patens* plants were dehydrated for 20 hours and transferred into sterile water for 1 hour. Plants were then transferred onto standard medium for recovery. Superoxide anions were detected following two days of recovery. **(a)** Toxic NO accumulation in wild-type plants and *yan/alryan*. More toxic NO can be observed in *yan/alryan* mutants than wild-type plants under water stress. NO (green), chlorophyll (red). Scale bar = 1 mm. **(b)** Quantitative analyses of NO fluorescence in *yan/alryan* mutants and wild-type plant using image J software. Values show means and standard deviations of three biological replicates for the wild-type and two independent mutants. Asterisks indicate a statistically significant difference compared with wild-type plants based on a two-tailed student's *t*-test ( $p < 0.05$ ). Scale bar = 2 mm. **(c)** Comparison of superoxide anion accumulation in *yan/alryan* mutants and wild-type plants under dehydration stress. Dark brown areas show superoxide anions.



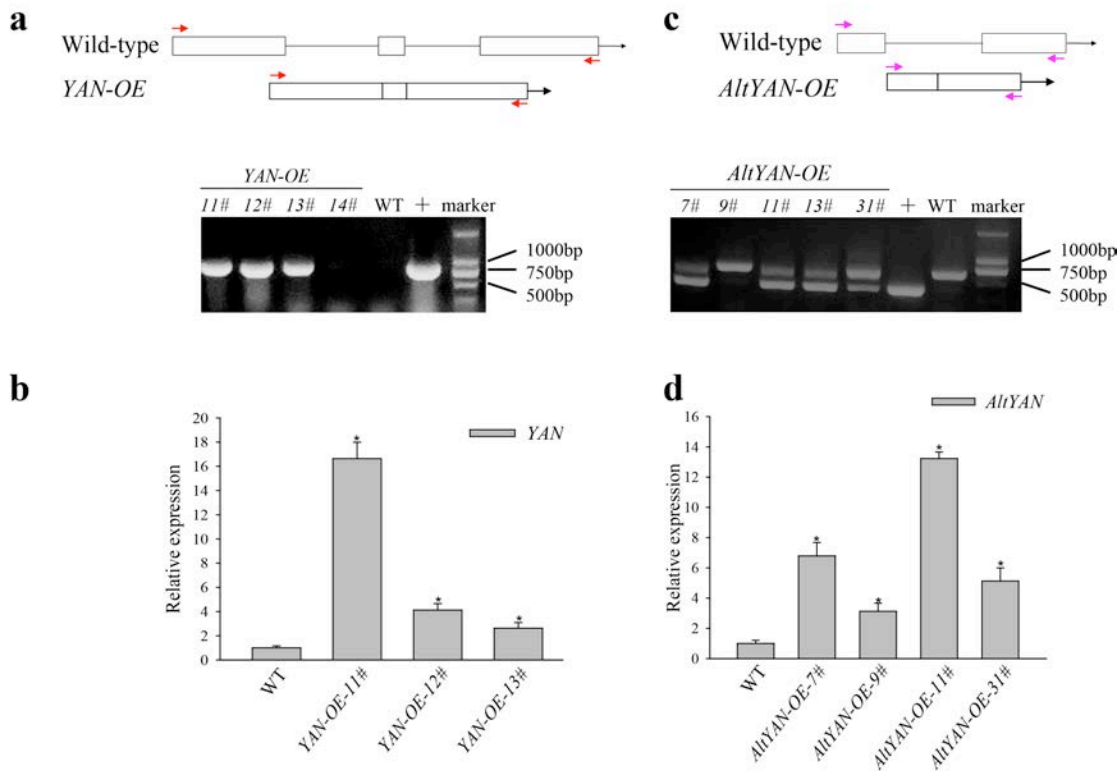

**Supplementary Figure 13.** Genotyping of *YAN-OE* and *AltYAN-OE* lines. **(a)** Genomic PCR was performed using DNA templates of *YAN-OE*, wild-type (negative control), and *pPOGI-YAN* (positive control). A primer pair designed to amplify full-length CDS of *YAN* was used. **(b)** Quantitative PCR was used to detect the expression level of *YAN* in *YAN-OE* lines. Values show means and standard deviations of three biological replicates for the wild-type and three *YAN-OE* lines. Asterisks indicate a statistically significant difference compared with wild-type plants based on a two-tailed student's *t*-test ( $p < 0.05$ ). **(c)** Genomic PCR was performed using DNA templates of *AltYAN-OE*, wild-type (negative control), and *pPOGI-AltYAN* (positive control). A primer pair designed to amplify full-length CDS of *AltYAN* was used. **(d)** Quantitative PCR was used to detect the expression level of *AltYAN* in *AltYAN-OE* lines. Values show means and standard deviations of three biological replicates for the wild-type and four *AltYAN-OE* lines. Asterisks indicate a statistically significant difference compared with wild-type plants based on a two-tailed student's *t*-test ( $p < 0.05$ ).

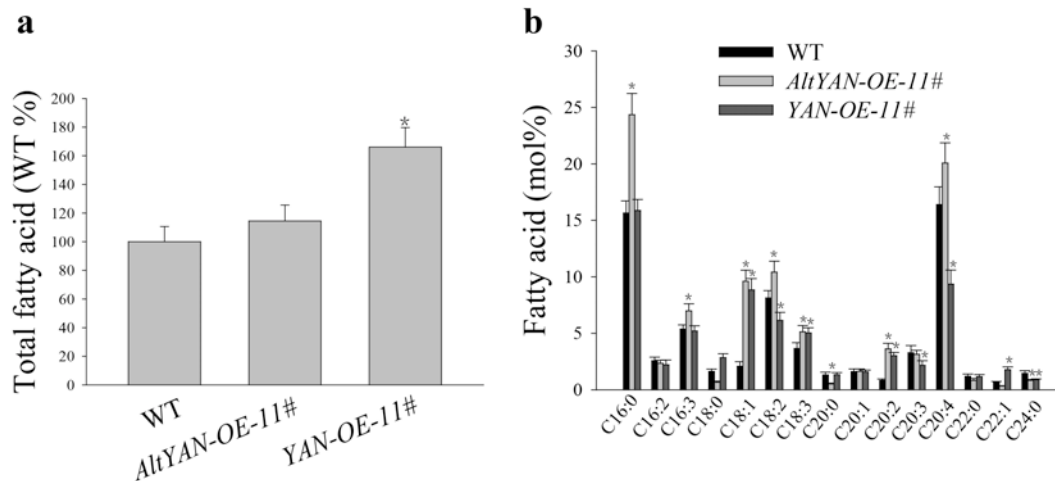

**Supplementary Figure 14.** Quantification of fatty acids in wild-type, *AltYAN-OE* and *YAN-OE* lines. Ten-week old plants were used to detect the composition and total amount of fatty acids. Values show means and standard deviations of three biological replicates for the wild-type, *AltYAN-OE-11#* and *YAN-OE-11#*. Asterisks indicate a statistically significant difference compared with wild-type plants based on a two-tailed student's *t*-test ( $p < 0.05$ ). **(a)** Total fatty acid content in the wild-type, *AltYAN-OE* and *YAN-OE* lines. **(b)** Comparison of fatty acid amount and composition in wild-type, *AltYAN-OE* and *YAN-OE* lines.

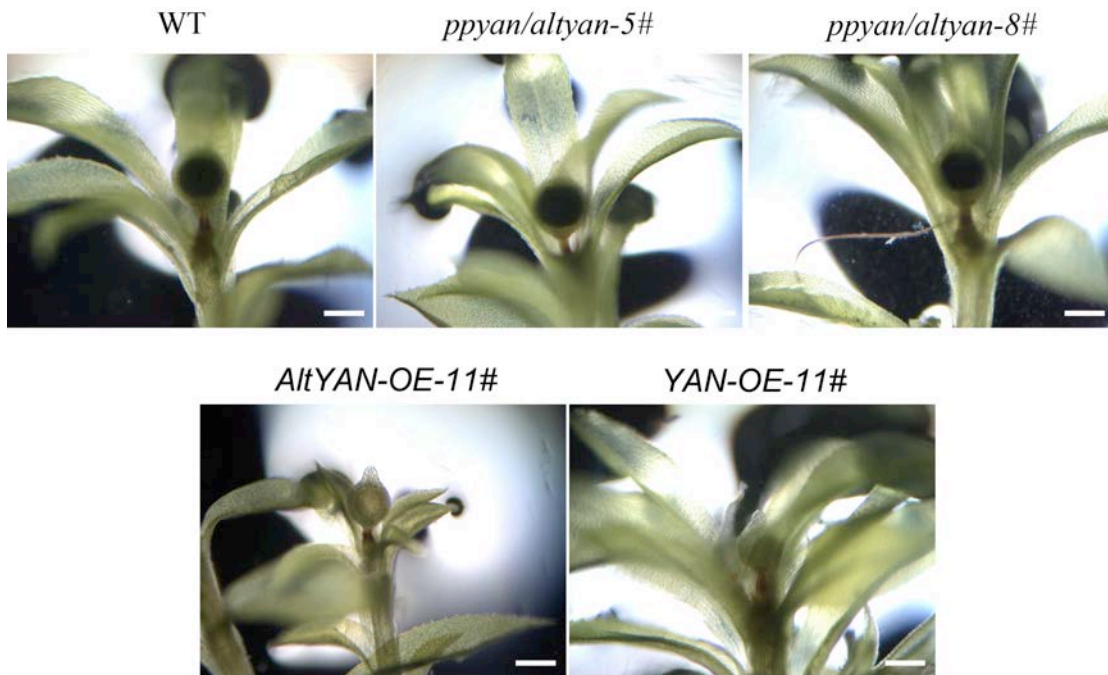

**Supplementary Figure 15.** Sporophytes of the wild-type and mutants. Plants were grown for 8 weeks at 25 °C before they were transferred to a short-day regime at 15 °C. After 4 weeks of sporophyte induction, visible sporophytes were photographed. Scale bar = 100  $\mu$ m.

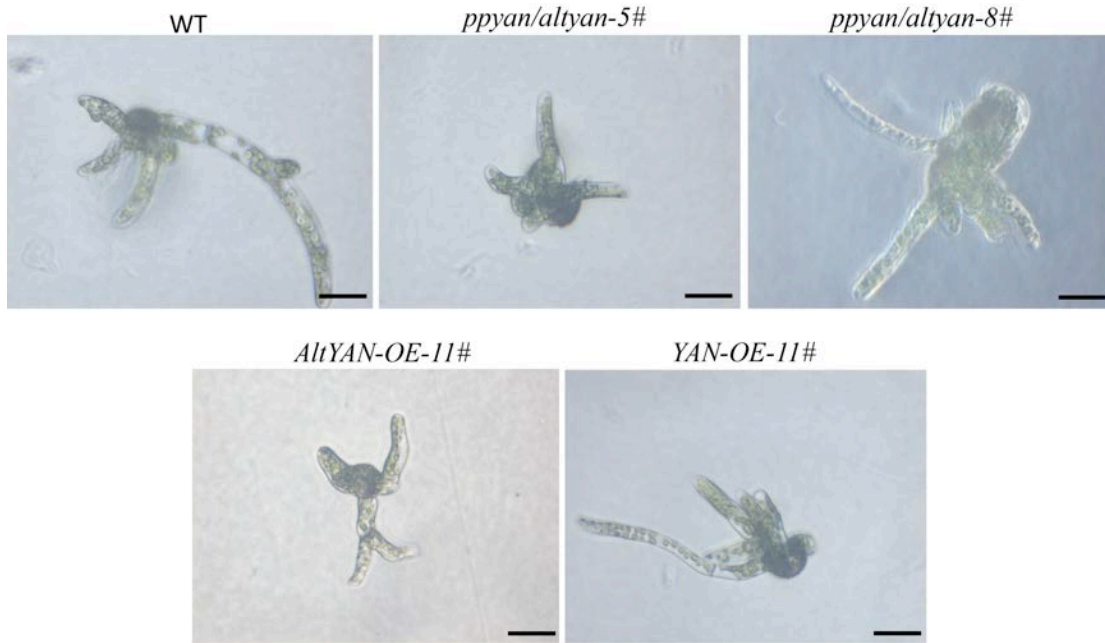

**Supplementary Figure 16.** Germination of spores from wild-type and mutant plants of *Physcomitrella patens*. Mature sporangia were sterilized using 10% sodium hypochlorite solution for 10 minutes, then washed 5 times using sterilized water. The sporangia were crushed using the tip of a pipet. The released spores were spread on BCDAT medium. The germinated spores were photographed after 4 days of incubation. Scale bar = 50  $\mu\text{m}$ .

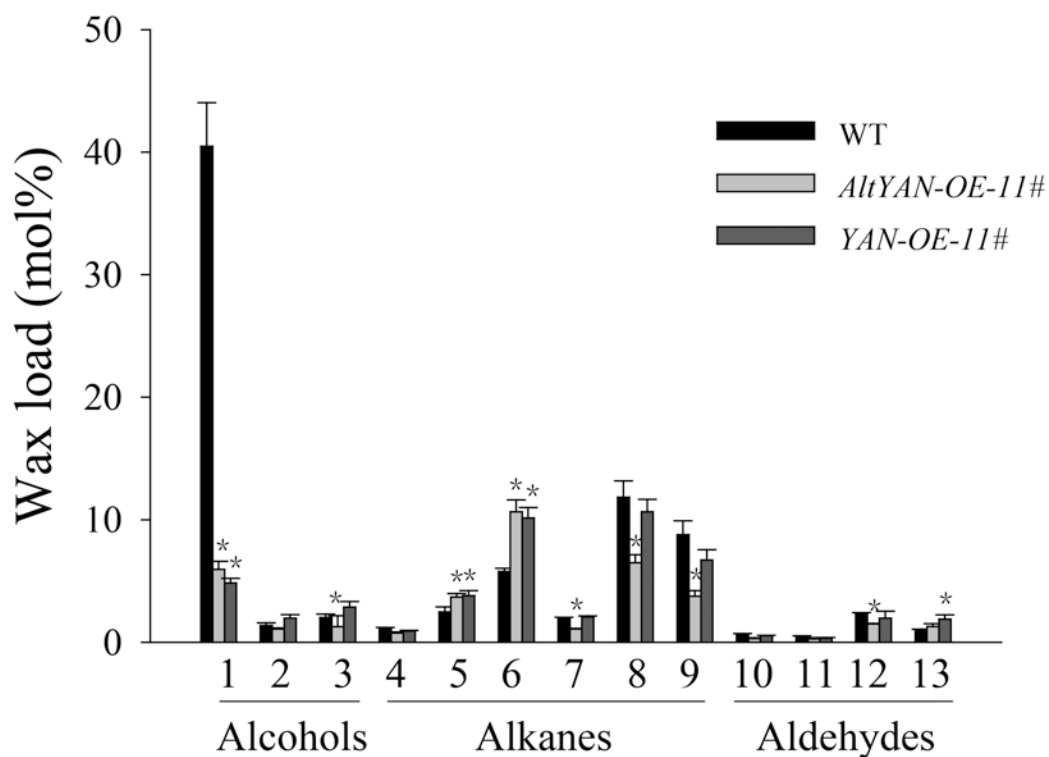

1. 16-Hydroxy ent-kaurane 2. 1-Tetracosanol 3. 1-Hexacosanol 4. Octadecane-1-bromo 5. Kaur-15-ene 6. Ent-kaurene 7. 1,19-Eicosadiene 8. 1,21-Docosadiene 9. 1,21-Tetracosene 10. Octadecanal 11. Eicosenal 12. Docosanal 13. Tetracosanal

**Supplementary Figure 17.** Quantification of wax in wild-type, *AltYAN-OE* and *YAN-OE* lines. Ten-week old plants were used to detect the composition of wax. Values show means and standard deviations of three biological replicates for the wild-type, *AltYAN-OE-11#* and *YAN-OE-11#*. Asterisks indicate a statistically significant difference compared with wild-type plants based on a two-tailed student's *t*-test ( $p < 0.05$ ).

a

Tor10224 Gametophyte rehydration Library *Sytrichia ruralis* cDNA, mRNA sequence.  
Sequence ID: [CN200553.1](#) Length: 501 Number of Matches: 1

Range 1: 1 to 444 [GenBank](#) [Graphics](#) ▼ Next Match ▲ Previous Match

| Score         | Expect                                                        | Method                       | Identities  | Positives    | Gaps      | Frame |
|---------------|---------------------------------------------------------------|------------------------------|-------------|--------------|-----------|-------|
| 192 bits(489) | 7e-60                                                         | Compositional matrix adjust. | 84/148(57%) | 110/148(74%) | 0/148(0%) | +1    |
| Query 47      | KWFNQLVWELSRHMVGEELVYVPLLDAMGPEGKEMADKDRADHQVKKELEEIHRLSDPG   |                              |             |              | 106       |       |
|               | +WFNQ VWE+SRH V EELV+YPL++A G G E+A++ R DRQ+ K LEE+ R +DP     |                              |             |              |           |       |
| Sbjct 1       | RWFNQFVWEISRHAVSEELVLYPLIEAKQGRGSELANQSRTDHQQTDKDILEELQRTTDPD |                              |             |              | 180       |       |
| Query 107     | LFEATLDRIMQDLRQHTNKEETQDLEYLKHADKKSLENAAKAFKYGKMAPTRPHGP      |                              |             |              | 166       |       |
|               | LFE +D++M +LR+H KEE++DL YLK+H + E A AF GK MAPTRPH +P          |                              |             |              |           |       |
| Sbjct 181     | LFEQRMDKMAELREHIRKEESEDLVYLKEHVSQDGREAACTAFSLGKTMAPTRPHASVP   |                              |             |              | 360       |       |
| Query 167     | NRSAALEAALAFFVTPDKLRDMFTPPF 194                               |                              |             |              |           |       |
|               | N+S A+EAL +TP+DKLRD+FTPPF                                     |                              |             |              |           |       |
| Sbjct 361     | NKSVAIEAALGLLTPMDKLRDIFTPPF 444                               |                              |             |              |           |       |

b

EST00039 mRNP Lambda ZapII Express Library *Sytrichia ruralis* cDNA clone mRNP39 3', mRNA sequence.  
Sequence ID: [A1305074.1](#) Length: 323 Number of Matches: 1

Range 1: 10 to 108 [GenBank](#) [Graphics](#) ▼ Next Match ▲ Previous Match

| Score         | Expect                                | Method                       | Identities | Positives  | Gaps     | Frame |
|---------------|---------------------------------------|------------------------------|------------|------------|----------|-------|
| 42.7 bits(99) | 0.014                                 | Compositional matrix adjust. | 18/33(55%) | 24/33(72%) | 0/33(0%) | +1    |
| Query 150     | FKYGKMAPTRPHGPINRSAALEAALAFFVTP 182   |                              |            |            |          |       |
|               | + G++ PT+PH +PN+ AALEAAL FVTP         |                              |            |            |          |       |
| Sbjct 10      | VRVGEEDVPTKPHAAVFNKPAALEAALGLFVTP 108 |                              |            |            |          |       |

**LIBRARY**

Lib Name: LIBEST\_001531 mRNP Lambda ZapII Express Library  
 Organism: [Sytrichia ruralis](#)  
 Tissue type: Desiccated Gametophytes  
 Vector: pBluescriptII  
 R. Site 1: EcoRI  
 R. Site 2: XhoI  
 Description: mRNA derived from the polysomal mRNP fraction of desiccated *Tortula ruralis* gametophytes, directionally cloned cDNA (lambda ZAPII) and in vivo excised to pBluescript (Stratagene)

c

SLA006H09\_34729 An expressed sequence tag (EST) collection from the resurrection plant *Selaginella lepidophylla* *Selaginella lepidophylla* cDNA clone SLA006H09 5, mRNA sequence.  
Sequence ID: [BM402674.1](#) Length: 590 Number of Matches: 1

Range 1: 249 to 590 [GenBank](#) [Graphics](#) ▼ Next Match ▲ Previous Match

| Score         | Expect                                                    | Method                       | Identities  | Positives   | Gaps      | Frame |
|---------------|-----------------------------------------------------------|------------------------------|-------------|-------------|-----------|-------|
| 125 bits(313) | 7e-33                                                     | Compositional matrix adjust. | 58/114(51%) | 82/114(71%) | 0/114(0%) | +3    |
| Query 14      | DLAGEIKHDEREFEEFYTYKRAYAGDEKAEKFNQVWELSRHMVGEELVYVPLDA 73 |                              |             |             |           |       |
|               | D+++I DE E +++Y YK A D++EA RWFNQ VWE+SRH V EELV+YPL+      |                              |             |             |           |       |
| Sbjct 249     | DIIKITTDBGELDDYKYSVAVGRDKEEALKFNQVWVSRHSVSEELVYPLER 428   |                              |             |             |           |       |
| Query 74      | MGFEKENADKDRADHQVKKELEEIHRLSDPGLFEATLDRIMQDLRQHTNKEE 127  |                              |             |             |           |       |
|               | G +GKE+ADK R+DH KVK+ L E+ ++DP FE +D +M++LR+H EE          |                              |             |             |           |       |
| Sbjct 429     | FDGKGEKELADKSRSDHKVKEYLAENQSDINDPLEFEPKMDMMKLEHIXMEE 590  |                              |             |             |           |       |

**An expressed sequence tag (EST) collection from the resurrection plant *Selaginella lepidophylla***

Identifiers: BioSample: SAMN00170085; EST: LIBEST\_010176  
 Organism: [Selaginella lepidophylla](#)  
cellular organisms; Eukaryota; Viridiplantae; Streptophyta; Streptophytina; Embryophyta; Tracheophyta; Lycopodiopsida; Selaginellales; Selaginellaceae; Selaginella  
 Attributes: **development stage** adult  
**tissue** microphyll fronds undergoing desiccation for 2.5 h  
**re\_1** EcoRI  
**v\_type** Phagemid  
**re\_2** XhoI  
**vector** Lambda Uni-Zap XR, Bluescript SK-  
 Description: Library construction was performed according to manufacture's (Stratagene, Inc.) recommended protocol for the Lambda UniZapXR vector and cDNA synthesis kit.  
 Submission: University of Nevada, Cushman JC; 2002-01-22  
 Accession: SAMN00170085 ID: 170085  
[EST](#)

**Supplementary Figure 18.** *Hr* genes are induced by dehydration and rehydration in two resurrection plants, the twisted moss *Syntrichia ruralis* and the spikemoss *Selaginella lepidophylla*. The *Hr* protein sequence from *Sphagnum fallax* (Phytozome identifier Sphfalx0048s0034.1) was used as query to perform TBLASTN search of NCBI dbEST database. **(a)** Alignment of *Sphagnum* *Hr* protein sequences with a translated sequence of *S. ruralis* rehydration transcript. **(b)** Alignment of *Sphagnum* *Hr* protein sequences with the translated sequence of another *S. ruralis* transcript, with the associated biosample record indicating that the sample was under desiccation. **(c)** Alignment of *Sphagnum* *Hr* protein sequences with a translated sequence of *S. lepidophylla* EST, with the associated biosample record indicating that the sample was under desiccation for 2.5 hours.

**Supplementary Table 1.** TBLASTN result of IKP database using a *Sphagnum* Hr protein sequence as query; Query=Sphfalx0048s0034.1 peptide (212 amino acids); E-value cutoff = 0.01.

| Sequences producing significant alignments:    | Score<br>(Bits) | E<br>Value |
|------------------------------------------------|-----------------|------------|
| scaffold-GOWD-2080086-Sphagnum_lescurii        | 285             | 7e-95      |
| scaffold-RDOO-2010340-Racomitrium_varium       | 227             | 4e-70      |
| scaffold-WOGB-2015424-Andreaea_rupestris       | 219             | 4e-68      |
| scaffold-FFPD-2009361-Ceratodon_purpureus      | 221             | 9e-68      |
| scaffold-RDOO-2116375-Racomitrium_varium       | 218             | 3e-67      |
| scaffold-VMXJ-2128859-Leucobryum_albidum       | 220             | 7e-67      |
| scaffold-KEFD-2005771-Encalypta_streptocarpa   | 214             | 3e-66      |
| scaffold-ABCD-2074154-Niphotrichum_elongatum   | 213             | 1e-65      |
| scaffold-RDOO-2116980-Racomitrium_varium       | 211             | 5e-64      |
| scaffold-HRWG-2013098-Buxbaumia_aphylla        | 207             | 1e-63      |
| scaffold-BPSG-2019772-Scouleria_aquatica       | 205             | 3e-62      |
| scaffold-WOGB-2092690-Andreaea_rupestris       | 204             | 8e-62      |
| scaffold-LGDQ-2041893-Selaginella_apoda        | 199             | 2e-61      |
| scaffold-TXVB-2071911-Lunularia_cruciata       | 199             | 4e-60      |
| scaffold-GRKU-2004786-Syntrichia_princeps      | 193             | 3e-59      |
| scaffold-JKAA-2008718-Selaginella_wallacei     | 199             | 3e-59      |
| scaffold-ABCD-2010707-Niphotrichum_elongatum   | 196             | 4e-59      |
| scaffold-JKAA-2008719-Selaginella_wallacei     | 199             | 6e-59      |
| scaffold-NGTD-2098183-Dicranum_scoparium       | 196             | 1e-58      |
| scaffold-JMXW-2003398-Bryum_argenteum          | 187             | 1e-56      |
| scaffold-ZYCD-2004286-Selaginella_acanthonota  | 196             | 1e-56      |
| scaffold-JMXW-2003397-Bryum_argenteum          | 187             | 3e-56      |
| scaffold-JMXW-2003396-Bryum_argenteum          | 186             | 6e-56      |
| scaffold-ZZOL-2052205-Selaginella_stauntoniana | 185             | 5e-55      |
| scaffold-ZYCD-2004285-Selaginella_acanthonota  | 196             | 8e-55      |
| scaffold-ORKS-2011502-Philonotis_fontana       | 191             | 5e-53      |
| scaffold-GRKU-2012644-Syntrichia_princeps      | 179             | 7e-53      |
| scaffold-PKOX-2012929-Isoetes_tegetiformans    | 181             | 1e-52      |
| scaffold-GRKU-2012643-Syntrichia_princeps      | 180             | 1e-52      |
| scaffold-VMXJ-2124089-Leucobryum_albidum       | 173             | 3e-51      |
| scaffold-RDOO-2109788-Racomitrium_varium       | 169             | 9e-51      |
| scaffold-FITN-2089742-Treubia_lacunose         | 177             | 9e-51      |
| scaffold-PYHZ-2006808-Isoetes_sp               | 177             | 2e-50      |
| scaffold-PKOX-2096679-Isoetes_tegetiformans    | 175             | 4e-50      |



|                                                           |     |       |
|-----------------------------------------------------------|-----|-------|
| scaffold-TMAJ-2173065-Neckera_douglasii                   | 161 | 2e-47 |
| scaffold-YPIC-2134561-Microstegium_vimineum               | 149 | 5e-42 |
| scaffold-RXRQ-2128249-Phaeoceros_carolinianus-sporophyte  | 145 | 5e-41 |
| scaffold-WCZB-2013633-Phaeoceros_carolinianus-gametophyte | 146 | 5e-41 |
| scaffold-JMXW-2040177-Bryum_argenteum                     | 146 | 6e-41 |
| scaffold-WNGH-2006956-Aulacomnium_heterostichum           | 145 | 3e-40 |
| scaffold-OFTV-2128708-Barbilophozia_barbata               | 144 | 1e-39 |
| scaffold-CMEQ-2082481-Orthotrichum_lyellii                | 144 | 2e-39 |
| scaffold-JBGU-2011382-Amaranthus_palmeri                  | 143 | 2e-39 |
| scaffold-YEPO-2071721-cf._Physcomitrium_sp                | 140 | 6e-39 |
| scaffold-WCZB-2114770-Phaeoceros_carolinianus-gametophyte | 142 | 4e-38 |
| scaffold-RXRQ-2022078-Phaeoceros_carolinianus-sporophyte  | 144 | 4e-38 |
| scaffold-IRBN-2152420-Scapania_nemorosa                   | 139 | 1e-37 |
| scaffold-RGKI-2054671-Leucobryum_glaucum                  | 134 | 4e-37 |
| scaffold-JKAA-2174841-Selaginella_wallacei                | 137 | 4e-37 |
| scaffold-RXRQ-2132940-Phaeoceros_carolinianus-sporophyte  | 136 | 3e-36 |
| scaffold-FFPD-2008086-Ceratodon_purpureus                 | 131 | 4e-36 |
| scaffold-FAJB-2053787-Paraphymatoceros_hallii             | 137 | 8e-36 |
| scaffold-RXRQ-2018681-Phaeoceros_carolinianus-sporophyte  | 136 | 2e-35 |
| scaffold-GRKU-2004785-Syntrichia_princeps                 | 132 | 4e-35 |
| scaffold-YBQN-2122714-Odontoschisma_prostratum            | 130 | 9e-35 |
| scaffold-JHFI-2105756-Pellia_neesiana                     | 129 | 2e-34 |
| scaffold-CMEQ-2081739-Orthotrichum_lyellii                | 129 | 5e-34 |
| scaffold-TGKW-2009714-Frullania                           | 126 | 3e-33 |
| scaffold-LNSF-2063071-Hypnum_subimponens                  | 125 | 4e-33 |
| scaffold-KJZG-2059461-Asplenium_platyneuron               | 129 | 5e-33 |
| scaffold-LNSF-2008214-Hypnum_subimponens                  | 127 | 7e-33 |
| scaffold-IRBN-2150099-Scapania_nemorosa                   | 125 | 8e-33 |
| scaffold-NOKI-2092089-Lindsaea_linearis                   | 128 | 1e-32 |
| scaffold-ABCD-2011017-Niphotrichum_elongatum              | 129 | 1e-32 |
| scaffold-NWQC-2149828-Plagiochila_asplenioides            | 126 | 2e-32 |
| scaffold-IRBN-2150967-Scapania_nemorosa                   | 125 | 2e-32 |
| scaffold-JKAA-2177860-Selaginella_wallacei                | 127 | 3e-32 |
| scaffold-GSXD-2062693-Myriopteris_eatonii                 | 124 | 5e-32 |
| scaffold-OFTV-2123041-Barbilophozia_barbata               | 121 | 9e-32 |
| scaffold-MZLD-2123763-Ligustrum_sinense                   | 124 | 1e-31 |
| scaffold-DCDT-2072974-Cheilanthes_arizonica               | 125 | 1e-31 |
| scaffold-KJZG-2058634-Asplenium_platyneuron               | 124 | 2e-31 |
| scaffold-HNDZ-2129005-Cystopteris_utahensis               | 122 | 3e-31 |
| scaffold-JBGU-2121651-Amaranthus_palmeri                  | 123 | 3e-31 |
| scaffold-LNSF-2008215-Hypnum_subimponens                  | 122 | 4e-31 |

|                                                           |      |       |
|-----------------------------------------------------------|------|-------|
| scaffold-JKAA-2170971-Selaginella_wallacei                | 119  | 8e-31 |
| scaffold-OCZL-2010080-Homalosorus_pycnocarpos             | 122  | 1e-30 |
| scaffold-ABCD-2009871-Niphotrichum_elongatum              | 122  | 1e-30 |
| scaffold-IGUH-2161180-Schwetschkeopsis_fabronia           | 120  | 1e-30 |
| scaffold-WNGH-2085370-Aulacomnium_heterostichum           | 121  | 3e-30 |
| scaffold-NWQC-2005566-Plagiochila_asplenioides            | 120  | 4e-30 |
| scaffold-NWQC-2005567-Plagiochila_asplenioides            | 118  | 9e-30 |
| scaffold-CQPW-2020236-Anemia_tomentosa                    | 119  | 3e-29 |
| scaffold-CPKP-2097340-Lophophora_williamsii               | 114  | 1e-28 |
| scaffold-WFBF-2000168-Podophyllum_peltatum                | 114  | 2e-28 |
| scaffold-JKAA-2167480-Selaginella_wallacei                | 111  | 5e-28 |
| scaffold-NRWZ-2091968-Metzgeria_crassipilis               | 110  | 1e-27 |
| scaffold-XDDT-2012577-Argyrochosma_nivea                  | 112  | 2e-27 |
| scaffold-IRBN-2142735-Scapania_nemorosa                   | 110  | 2e-27 |
| scaffold-RDOO-2109148-Racomitrium_varium                  | 106  | 4e-26 |
| scaffold-WOGB-2081836-Andreaea_rupestris                  | 103  | 1e-25 |
| scaffold-OSHQ-2044949-Sarcandra_glabra                    | 106  | 2e-25 |
| scaffold-ZTHV-2000232-Atrichum_angustatum                 | 103  | 2e-24 |
| scaffold-NRWZ-2009763-Metzgeria_crassipilis               | 99.4 | 2e-23 |
| scaffold-WTDE-2023700-Johnsonia_pubescens                 | 99.8 | 2e-23 |
| scaffold-IGUH-2154130-Schwetschkeopsis_fabronia           | 99.4 | 2e-23 |
| scaffold-SALZ-2065380-Pittosporum_resiniferum-fruit       | 100  | 8e-23 |
| scaffold-WCZB-2102726-Phaeoceros_carolinianus-gametophyte | 96.3 | 2e-22 |
| scaffold-CHJJ-2127518-Lejeuneaceae_sp                     | 96.7 | 2e-22 |
| scaffold-CIEA-2049265-Juncus_inflexus                     | 98.6 | 2e-22 |
| scaffold-NGTD-2090279-Dicranum_scoparium                  | 96.3 | 3e-22 |
| scaffold-IRBN-2139892-Scapania_nemorosa                   | 95.9 | 5e-22 |
| scaffold-VQYB-2010950-Neurachne_lanigera                  | 95.5 | 2e-21 |
| scaffold-ABCD-2064447-Niphotrichum_elongatum              | 93.6 | 2e-21 |
| scaffold-OCWZ-2051463-Dioscorea_villosa                   | 97.1 | 5e-21 |
| scaffold-PSHB-2008862-Lantana_camara                      | 94.0 | 7e-21 |
| scaffold-KEFD-2050257-Encalypta_streptocarpa              | 91.7 | 9e-21 |
| scaffold-KEFD-2054814-Encalypta_streptocarpa              | 92.8 | 1e-20 |
| scaffold-VMXJ-2107202-Leucobryum_albidum                  | 89.0 | 5e-20 |
| scaffold-YWNF-2008347-Hedwigia_ciliata                    | 90.9 | 1e-19 |
| scaffold-RGKI-2054107-Leucobryum_glaucum                  | 88.2 | 2e-19 |
| scaffold-TMAJ-2001356-Neckera_douglasii                   | 92.0 | 2e-19 |
| scaffold-YWNF-2008346-Hedwigia_ciliata                    | 91.7 | 4e-19 |
| scaffold-RTMU-2149348-Calypogeia_fissa                    | 86.7 | 7e-19 |
| scaffold-HATH-2079510-Aristida_stricta                    | 87.0 | 9e-19 |
| scaffold-ZXJO-2012394-Hemionitis_arifolia                 | 87.0 | 3e-18 |

|                                                                    |      |       |
|--------------------------------------------------------------------|------|-------|
| scaffold-YPIC-2132251-Microstegium_vimineum                        | 86.3 | 4e-18 |
| scaffold-WVMY-2126909-Phlox_drummondii                             | 86.3 | 4e-18 |
| scaffold-ABIJ-2031254-Selaginella_lepidophylla                     | 83.2 | 9e-18 |
| scaffold-MVSE-2025297-Griselinia_littoralis                        | 85.5 | 9e-18 |
| scaffold-RDOO-2015219-Racomitrium_varium                           | 85.5 | 1e-17 |
| scaffold-IRBN-2122784-Scapania_nemorosa                            | 80.9 | 7e-17 |
| scaffold-VMXJ-2115109-Leucobryum_albidum                           | 81.6 | 7e-17 |
| scaffold-UEEN-2146356-Forestiera_segregata                         | 80.5 | 1e-16 |
| scaffold-YPIC-2127709-Microstegium_vimineum                        | 81.3 | 1e-16 |
| scaffold-NWQC-2113770-Plagiochila_asplenioides                     | 80.1 | 1e-16 |
| scaffold-IRBN-2155004-Scapania_nemorosa                            | 85.1 | 2e-16 |
| scaffold-WNGH-2012483-Aulacomnium_heterostichum                    | 83.2 | 2e-16 |
| scaffold-YPIC-2115414-Microstegium_vimineum                        | 79.0 | 3e-16 |
| scaffold-POPJ-2014900-Pteris_vittata                               | 80.5 | 4e-16 |
| scaffold-PKOX-2008033-Isoetes_tegetiformans                        | 59.7 | 9e-16 |
| scaffold-IGUH-2105402-Schwetschkeopsis_fabronia                    | 77.0 | 1e-15 |
| scaffold-QMWB-2052150-Anomodon_attenuatus                          | 78.6 | 1e-15 |
| scaffold-NGTD-2089101-Dicranum_scoparium                           | 79.0 | 1e-15 |
| scaffold-BGXB-2069679-Plagiomnium_insigne                          | 78.6 | 1e-15 |
| scaffold-OCWZ-2048666-Dioscorea_villosa                            | 79.3 | 2e-15 |
| scaffold-IRBN-2002456-Scapania_nemorosa                            | 78.6 | 2e-15 |
| scaffold-TVSH-2057737-Bituminaria_bituminosa                       | 77.0 | 3e-15 |
| scaffold-XWHK-2033525-Funaria                                      | 75.9 | 3e-15 |
| scaffold-NGTD-2072576-Dicranum_scoparium                           | 75.9 | 3e-15 |
| scaffold-NDUV-2084566-Vittaria_appalachiana                        | 75.9 | 6e-15 |
| scaffold-TMAJ-2176774-Neckera_douglasii                            | 78.6 | 1e-14 |
| scaffold-WTDE-2120279-Johnsonia_pubescens                          | 75.5 | 1e-14 |
| scaffold-WPUV-2050890-Oenothera_grandis-MTJ_135                    | 74.7 | 3e-14 |
| scaffold-ZENX-2075599-Neurachne_alopeuroidea                       | 73.6 | 4e-14 |
| scaffold-VMXJ-2101389-Leucobryum_albidum                           | 72.8 | 6e-14 |
| scaffold-XWDM-2024866-XWDM-Cystopteris_fragilis-2_samples_combined | 62.0 | 9e-14 |
| scaffold-CPKP-2083294-Lophophora_williamsii                        | 72.0 | 2e-13 |
| scaffold-CVEG-2117220-Azolla_cf._caroliniana                       | 72.4 | 2e-13 |
| scaffold-RTMU-2146607-Calypogeia_fissa                             | 72.0 | 3e-13 |
| scaffold-PYHZ-2058919-Isoetes_sp                                   | 65.9 | 3e-13 |
| scaffold-TMAJ-2146025-Neckera_douglasii                            | 70.1 | 8e-13 |
| scaffold-UPMJ-2080149-Pseudolycopodiella_caroliniana               | 73.6 | 1e-12 |
| scaffold-ZTHV-2078155-Atrichum_angustatum                          | 59.3 | 1e-12 |
| scaffold-RTMU-2082020-Calypogeia_fissa                             | 68.6 | 1e-12 |
| scaffold-CMEQ-2067654-Orthotrichum_lyellii                         | 68.9 | 2e-12 |
| scaffold-RTMU-2159248-Calypogeia_fissa                             | 70.9 | 2e-12 |

|                                                                 |      |       |
|-----------------------------------------------------------------|------|-------|
| scaffold-KEFD-2052864-Encalypta_streptocarpa                    | 70.5 | 2e-12 |
| scaffold-CMEQ-2063716-Orthotrichum_lyellii                      | 67.4 | 4e-12 |
| scaffold-YPIC-2024478-Microstegium_vimineum                     | 70.1 | 5e-12 |
| scaffold-HATH-2073870-Aristida_stricta                          | 68.2 | 6e-12 |
| scaffold-PMRP-2036296-Cannabis_sativa-stem                      | 70.1 | 1e-11 |
| scaffold-BJSW-2066960-BJSW-Cannabis_sativa-4_samples_combined   | 70.1 | 1e-11 |
| scaffold-IMZV-2080047-IMZV-Oenothera_grandis-5_samples_combined | 67.0 | 2e-11 |
| scaffold-RXRQ-2131384-Phaeoceros_carolinianus-sporophyte        | 69.7 | 2e-11 |
| scaffold-OCWZ-2044044-Dioscorea_villosa                         | 66.2 | 3e-11 |
| scaffold-CHJJ-2130531-Lejeuneaceae_sp                           | 68.2 | 3e-11 |
| scaffold-GKAG-2079692-Huperzia_lucidula                         | 65.1 | 5e-11 |
| scaffold-IGUH-2160559-Schwetschkeopsis_fabronia                 | 68.6 | 6e-11 |
| scaffold-CHJJ-2012733-Lejeuneaceae_sp                           | 68.6 | 6e-11 |
| scaffold-KRUQ-2055797-Porella_navicularis                       | 63.2 | 1e-10 |
| scaffold-VMXJ-2081240-Leucobryum_albidum                        | 63.5 | 1e-10 |
| scaffold-JKAA-2154702-Selaginella_wallacei                      | 64.3 | 1e-10 |
| scaffold-JSAG-2054274-Masdevallia_yuangensis                    | 62.8 | 2e-10 |
| scaffold-FITN-2084753-Treubia_lacunose                          | 65.9 | 2e-10 |
| scaffold-GRKU-2069920-Syntrichia_princeps                       | 63.5 | 3e-10 |
| scaffold-ABCD-2067800-Niphotrichum_elongatum                    | 64.3 | 5e-10 |
| scaffold-IGUH-2157080-Schwetschkeopsis_fabronia                 | 64.7 | 6e-10 |
| scaffold-RTMU-2014569-Calypogeia_fissa                          | 46.6 | 6e-10 |
| scaffold-NRWZ-2079339-Metzgeria_crassipilis                     | 62.4 | 8e-10 |
| scaffold-NRWZ-2092900-Metzgeria_crassipilis                     | 64.3 | 1e-09 |
| scaffold-LHLE-2056411-Cystopteris_fragilis                      | 61.6 | 1e-09 |
| scaffold-HATH-2079179-Aristida_stricta                          | 63.2 | 1e-09 |
| scaffold-UUHD-2077091-Porella_pinnata                           | 60.5 | 1e-09 |
| scaffold-LNSF-2055857-Hypnum_subimponens                        | 62.0 | 2e-09 |
| scaffold-FFPD-2029090-Ceratodon_purpureus                       | 59.7 | 2e-09 |
| scaffold-TMAJ-2012211-Neckera_douglasii                         | 62.8 | 2e-09 |
| scaffold-MIRS-2073569-Climacium_dendroides                      | 61.2 | 3e-09 |
| scaffold-HPXA-2104167-Ptilidium_pulcherrimum                    | 60.5 | 3e-09 |
| scaffold-CHJJ-2000052-Lejeuneaceae_sp                           | 63.2 | 4e-09 |
| scaffold-GRKU-2071783-Syntrichia_princeps                       | 60.8 | 5e-09 |
| scaffold-VMXJ-2123744-Leucobryum_albidum                        | 63.2 | 5e-09 |
| scaffold-HVBQ-2112238-Tetraphis_pellucida                       | 60.5 | 6e-09 |
| scaffold-QMWB-2055650-Anomodon_attenuatus                       | 62.0 | 6e-09 |
| scaffold-HPXA-2127478-Ptilidium_pulcherrimum                    | 62.0 | 7e-09 |
| scaffold-WOGB-2084446-Andreaea_rupestris                        | 60.5 | 7e-09 |
| scaffold-JKAA-2078739-Selaginella_wallacei                      | 57.8 | 1e-08 |
| scaffold-AEXY-2130519-Blasia_sp                                 | 60.8 | 1e-08 |

|                                                                  |      |       |
|------------------------------------------------------------------|------|-------|
| scaffold-JKAA-2165817-Selaginella_wallacei                       | 60.5 | 1e-08 |
| scaffold-PSHB-2043956-Lantana_camara                             | 58.2 | 1e-08 |
| scaffold-NGTD-2089411-Dicranum_scoparium                         | 60.1 | 1e-08 |
| scaffold-JMXW-2034222-Bryum_argenteum                            | 58.5 | 2e-08 |
| scaffold-TMAJ-2003433-Neckera_douglasii                          | 58.9 | 2e-08 |
| scaffold-NRWZ-2085378-Metzgeria_crassipilis                      | 58.9 | 2e-08 |
| scaffold-KEFD-2044179-Encalypta_streptocarpa                     | 57.4 | 4e-08 |
| scaffold-GRRW-2048048-Grevillea_robusta                          | 57.8 | 4e-08 |
| scaffold-ABCD-2058843-Niphotrichum_elongatum                     | 57.4 | 5e-08 |
| scaffold-PSHB-2039572-Lantana_camara                             | 55.5 | 9e-08 |
| scaffold-XNXF-2001698-Dendrolycopodium_obscurum                  | 53.5 | 1e-07 |
| scaffold-IRBN-2103858-Scapania_nemorosa                          | 55.5 | 2e-07 |
| scaffold-TMWO-2076697-Papaver_bracteatum-bulb                    | 54.7 | 2e-07 |
| scaffold-SSDU-2123337-SSDU-Papaver_bracteatum-3_samples_combined | 54.7 | 2e-07 |
| scaffold-VMXJ-2120453-Leucobryum_albidum                         | 57.4 | 2e-07 |
| scaffold-JHCN-2084608-Oxalis_sp                                  | 57.0 | 3e-07 |
| scaffold-NRWZ-2088588-Metzgeria_crassipilis                      | 56.2 | 3e-07 |
| scaffold-UAXP-2066247-Gyrostemon_ramulosus                       | 55.5 | 3e-07 |
| scaffold-IGUH-2005101-Schwetschkeopsis_fabronia                  | 57.4 | 3e-07 |
| scaffold-NRWZ-2089194-Metzgeria_crassipilis                      | 56.2 | 4e-07 |
| scaffold-RTMU-2146256-Calpogeia_fissa                            | 55.5 | 4e-07 |
| scaffold-VMXJ-2077554-Leucobryum_albidum                         | 53.9 | 5e-07 |
| scaffold-OFTV-2003852-Barbilophozia_barbata                      | 57.4 | 5e-07 |
| scaffold-ZXJO-2005224-Hemionitis_arifolia                        | 55.8 | 6e-07 |
| scaffold-ABIJ-2034612-Selaginella_lepidophylla                   | 55.5 | 8e-07 |
| scaffold-YEPO-2030533-cf._Physcomitrium_sp                       | 52.8 | 8e-07 |
| scaffold-WOGB-2008726-Andreaea_rupestris                         | 55.8 | 9e-07 |
| scaffold-CHJJ-2116743-Lejeuneaceae_sp                            | 53.9 | 1e-06 |
| scaffold-IRBN-2005941-Scapania_nemorosa                          | 56.2 | 2e-06 |
| scaffold-IRBN-2005942-Scapania_nemorosa                          | 56.2 | 2e-06 |
| scaffold-IRBN-2076572-Scapania_nemorosa                          | 52.0 | 2e-06 |
| scaffold-ABCD-2014511-Niphotrichum_elongatum                     | 51.2 | 3e-06 |
| scaffold-OFTV-2087677-Barbilophozia_barbata                      | 42.0 | 3e-06 |
| scaffold-HPXA-2008638-Ptilidium_pulcherrimum                     | 38.9 | 3e-06 |
| scaffold-RDOO-2089861-Racomitrium_varium                         | 52.0 | 4e-06 |
| scaffold-IRBN-2155117-Scapania_nemorosa                          | 55.1 | 5e-06 |
| scaffold-IGUH-2005100-Schwetschkeopsis_fabronia                  | 53.9 | 5e-06 |
| scaffold-YPIC-2124849-Microstegium_vimineum                      | 52.4 | 6e-06 |
| scaffold-HPXA-2105951-Ptilidium_pulcherrimum                     | 51.6 | 7e-06 |
| scaffold-MROH-2036845-Thelypteris_acuminata                      | 52.0 | 7e-06 |
| scaffold-ZSAB-2180975-Hoheria_angustifolia                       | 52.0 | 9e-06 |

|                                                                   |      |       |
|-------------------------------------------------------------------|------|-------|
| scaffold-YCKE-2055091-Notholaena_montieliae                       | 52.8 | 9e-06 |
| scaffold-TMAJ-2120109-Neckera_douglasii                           | 50.8 | 9e-06 |
| scaffold-LRTN-2087772-Monotropa_uniflora                          | 51.6 | 1e-05 |
| scaffold-GRKU-2044556-Syntrichia_princeps                         | 49.7 | 1e-05 |
| scaffold-CHJJ-2119525-Lejeuneaceae_sp                             | 51.2 | 2e-05 |
| scaffold-NGTD-2066643-Dicranum_scoparium                          | 49.7 | 2e-05 |
| scaffold-CMEQ-2082860-Orthotrichum_lyellii                        | 53.1 | 3e-05 |
| scaffold-WOGB-2051835-Andreaea_rupestris                          | 48.5 | 3e-05 |
| scaffold-MVSE-2190933-Griselinia_littoralis                       | 49.3 | 4e-05 |
| scaffold-PSHB-2043518-Lantana_camara                              | 43.1 | 5e-05 |
| scaffold-HATH-2002294-Aristida_stricta                            | 49.7 | 5e-05 |
| scaffold-JKAA-2053839-Selaginella_wallacei                        | 48.1 | 5e-05 |
| scaffold-YWNF-2020517-Hedwigia_ciliata                            | 47.8 | 5e-05 |
| scaffold-YWNF-2020516-Hedwigia_ciliata                            | 47.8 | 5e-05 |
| scaffold-FROP-2070730-FROP-Epifagus_virginiana-2_samples_combined | 49.3 | 6e-05 |
| scaffold-WCZB-2085267-Phaeoceros_carolinianus-gametophyte         | 48.5 | 6e-05 |
| scaffold-BJSW-2012126-BJSW-Cannabis_sativa-4_samples_combined     | 50.1 | 7e-05 |
| scaffold-WFBF-2003972-Podophyllum_peltatum                        | 51.2 | 7e-05 |
| scaffold-WOGB-2008722-Andreaea_rupestris                          | 49.3 | 8e-05 |
| scaffold-VMXJ-2036090-Leucobryum_albidum                          | 47.0 | 9e-05 |
| scaffold-OQWW-2161174-Davallia_fejeensis                          | 47.4 | 1e-04 |
| scaffold-YPIC-2134240-Microstegium_vimineum                       | 50.1 | 2e-04 |
| scaffold-KRUQ-2090857-Porella_navicularis                         | 47.8 | 2e-04 |
| scaffold-NGTD-2062919-Dicranum_scoparium                          | 47.0 | 2e-04 |
| scaffold-OXYP-2078939-Sideroxylon_reclinatum                      | 46.6 | 2e-04 |
| scaffold-KEFD-2052641-Encalypta_streptocarpa                      | 48.5 | 2e-04 |
| scaffold-XRCX-2095148-Aster_tataricus                             | 48.5 | 2e-04 |
| scaffold-CHJJ-2127168-Lejeuneaceae_sp                             | 48.5 | 3e-04 |
| scaffold-JKAA-2061455-Selaginella_wallacei                        | 45.8 | 3e-04 |
| scaffold-CVEG-2094112-Azolla_cf._caroliniana                      | 46.2 | 4e-04 |
| scaffold-OQWW-2161093-Davallia_fejeensis                          | 45.8 | 4e-04 |
| scaffold-JKAA-2008453-Selaginella_wallacei                        | 47.8 | 4e-04 |
| scaffold-LNSF-2045802-Hypnum_subimponens                          | 46.2 | 5e-04 |
| scaffold-NRWZ-2086705-Metzgeria_crassipilis                       | 47.4 | 5e-04 |
| scaffold-FAJB-2050601-Paraphymatoceros_hallii                     | 47.8 | 6e-04 |
| scaffold-NDUV-2080635-Vittaria_appalachiana                       | 45.8 | 7e-04 |
| scaffold-VMXJ-2028561-Leucobryum_albidum                          | 44.7 | 7e-04 |
| scaffold-TGKW-2021476-Frullania                                   | 44.3 | 0.001 |
| scaffold-EWVK-2077938-Thyrsopteris_elegans                        | 44.7 | 0.001 |
| scaffold-RDOO-2025299-Racomitrium_varium                          | 43.9 | 0.001 |
| scaffold-KEFD-2043942-Encalypta_streptocarpa                      | 45.1 | 0.001 |

|                                             |      |       |
|---------------------------------------------|------|-------|
| scaffold-VMXJ-2028149-Leucobryum_albidum    | 43.5 | 0.002 |
| scaffold-VBMM-2023838-Anomodon_rostratus    | 43.5 | 0.002 |
| scaffold-JKAA-2129507-Selaginella_wallacei  | 43.9 | 0.002 |
| scaffold-PMRP-2006102-Cannabis_sativa-stem  | 45.4 | 0.003 |
| scaffold-NRWZ-2069162-Metzgeria_crassipilis | 43.9 | 0.003 |
| scaffold-NDUV-2096264-Vittaria_appalachiana | 45.8 | 0.004 |
| scaffold-WOGB-2064377-Andreaea_rupestris    | 43.1 | 0.005 |
| scaffold-NRWZ-2047801-Metzgeria_crassipilis | 42.0 | 0.009 |
| scaffold-CHJJ-2131097-Lejeuneaceae_sp       | 44.7 | 0.009 |

**Supplementary Table 2.** Taxonomic report of TBLASTN search of *nr* database using a translated charophyte sequence (ISGT-2038756) as query. The sequence was retrieved from 1KP and translated into six frames. The match to Hr protein sequences was used as query to search the *nr* databases. E-value cutoff = 1.

| Organism                                   | Blast Name              | Score | Number of Hits | Description                                        |
|--------------------------------------------|-------------------------|-------|----------------|----------------------------------------------------|
| cellular organisms                         |                         |       | 167            |                                                    |
| .Bacteria                                  | bacteria                |       | 159            |                                                    |
| ..Proteobacteria                           | proteobacteria          |       | 143            |                                                    |
| ..Alphaproteobacteria                      | a-proteobacteria        |       | 99             |                                                    |
| ....Rhodospirillales                       | a-proteobacteria        |       | 11             |                                                    |
| .....Rhodospirillaceae                     | a-proteobacteria        |       | 4              |                                                    |
| .....Rhodospirillaceae bacterium CCH5-H10  | <u>a-proteobacteria</u> | 50.4  | 1              | <u>Rhodospirillaceae bacterium CCH5-H10 hits</u>   |
| .....Phaeospirillum fulvum                 | a-proteobacteria        | 46.6  | 1              | Phaeospirillum fulvum hits                         |
| .....Phaeospirillum fulvum MGU-K5          | <u>a-proteobacteria</u> | 39.7  | 1              | <u>Phaeospirillum fulvum MGU-K5 hits</u>           |
| .....Dongia sp. URHE0060                   | a-proteobacteria        | 37.4  | 1              | Dongia sp. URHE0060 hits                           |
| .....Rhodospirillales bacterium URHD0017   | <u>a-proteobacteria</u> | 47.8  | 4              | <u>Rhodospirillales bacterium URHD0017 hits</u>    |
| .....Reyranella massiliensis               | a-proteobacteria        | 40.4  | 1              | Reyranella massiliensis hits                       |
| .....Rhodospirillales bacterium SCN 65-16  | <u>a-proteobacteria</u> | 40.0  | 1              | <u>Rhodospirillales bacterium SCN 65-16 hits</u>   |
| .....Enhydrobacter aerosaccus              | a-proteobacteria        | 37.0  | 1              | Enhydrobacter aerosaccus hits                      |
| ....Sphingobium cloacae                    | a-proteobacteria        | 47.0  | 2              | Sphingobium cloacae hits                           |
| ....Sphingobium baderi                     | a-proteobacteria        | 46.6  | 2              | Sphingobium baderi hits                            |
| ....Sphingobium chungbukense               | <u>a-proteobacteria</u> | 46.2  | 2              | <u>Sphingobium chungbukense hits</u>               |
| ....Sphingobium japonicum                  | a-proteobacteria        | 46.2  | 2              | Sphingobium japonicum hits                         |
| ....Sphingobium japonicum UT26S            | <u>a-proteobacteria</u> | 46.2  | 1              | <u>Sphingobium japonicum UT26S hits</u>            |
| ....Sphingobium                            | a-proteobacteria        | 46.2  | 2              | Sphingobium hits                                   |
| ....Sphingobium chinhatense IP26           | <u>a-proteobacteria</u> | 46.2  | 1              | <u>Sphingobium chinhatense IP26 hits</u>           |
| ....Sphingobium sp. HDIP04                 | a-proteobacteria        | 46.2  | 1              | Sphingobium sp. HDIP04 hits                        |
| ....Sphingobium lucknowense F2             | a-proteobacteria        | 46.2  | 1              | Sphingobium lucknowense F2 hits                    |
| ....Sphingomonadaceae                      | a-proteobacteria        | 46.2  | 2              | Sphingomonadaceae hits                             |
| ....Sphingomonas sp. BHC-A                 | <u>a-proteobacteria</u> | 46.2  | 1              | <u>Sphingomonas sp. BHC-A hits</u>                 |
| ....Sphingobium indicum B90A               | a-proteobacteria        | 46.2  | 1              | Sphingobium indicum B90A hits                      |
| ....Sphingobium yanoikuyae                 | a-proteobacteria        | 44.7  | 4              | Sphingobium yanoikuyae hits                        |
| ....Sphingobium sp. YBL2                   | a-proteobacteria        | 44.7  | 1              | Sphingobium sp. YBL2 hits                          |
| ....Sphingobium sp. AM                     | a-proteobacteria        | 44.7  | 1              | Sphingobium sp. AM hits                            |
| ....Sphingobium sp. 22B                    | <u>a-proteobacteria</u> | 44.7  | 1              | <u>Sphingobium sp. 22B hits</u>                    |
| ....Sphingomonas paucimobilis              | a-proteobacteria        | 44.7  | 3              | Sphingomonas paucimobilis hits                     |
| ....Sphingomonas sp. MEA3-1                | a-proteobacteria        | 44.7  | 1              | Sphingomonas sp. MEA3-1 hits                       |
| ....alpha proteobacterium LLX12A           | <u>a-proteobacteria</u> | 43.1  | 1              | <u>alpha proteobacterium LLX12A hits</u>           |
| ....Novosphingobium sp. Rr 2-17            | <u>a-proteobacteria</u> | 43.1  | 2              | <u>Novosphingobium sp. Rr 2-17 hits</u>            |
| ....Caulobacter sp. K31                    | a-proteobacteria        | 43.1  | 2              | Caulobacter sp. K31 hits                           |
| ....Sphingobium sp. DC-2                   | a-proteobacteria        | 42.4  | 1              | Sphingobium sp. DC-2 hits                          |
| ....Caulobacter sp. Root343                | a-proteobacteria        | 42.4  | 2              | Caulobacter sp. Root343 hits                       |
| ....Caulobacter henricii                   | <u>a-proteobacteria</u> | 42.4  | 1              | <u>Caulobacter henricii hits</u>                   |
| ....Brevundimonas viscosa                  | a-proteobacteria        | 42.4  | 2              | Brevundimonas viscosa hits                         |
| ....Sphingomonas koreensis                 | a-proteobacteria        | 42.0  | 3              | Sphingomonas koreensis hits                        |
| ....Sphingobium quisquiliarum              | a-proteobacteria        | 42.0  | 1              | Sphingobium quisquiliarum hits                     |
| ....Sphingobium quisquiliarum P25          | <u>a-proteobacteria</u> | 42.0  | 1              | <u>Sphingobium quisquiliarum P25 hits</u>          |
| ....Sphingobium sp. MI1205                 | a-proteobacteria        | 41.2  | 2              | Sphingobium sp. MI1205 hits                        |
| ....Sphingomonas sp. Root241               | a-proteobacteria        | 41.2  | 2              | Sphingomonas sp. Root241 hits                      |
| ....Novosphingobium panipatense            | <u>a-proteobacteria</u> | 41.2  | 1              | <u>Novosphingobium panipatense hits</u>            |
| ....Sphingobium herbicidovorans            | <u>a-proteobacteria</u> | 41.2  | 1              | <u>Sphingobium herbicidovorans hits</u>            |
| ....Sphingobium herbicidovorans NBRC 16415 | <u>a-proteobacteria</u> | 41.2  | 1              | <u>Sphingobium herbicidovorans NBRC 16415 hits</u> |
| ....Sphingomonas pruni                     | a-proteobacteria        | 40.8  | 1              | Sphingomonas pruni hits                            |
| ....Sphingobium sp. YL23                   | <u>a-proteobacteria</u> | 40.0  | 1              | <u>Sphingobium sp. YL23 hits</u>                   |
| ....Sphingomonas sp. Ndbn-20               | a-proteobacteria        | 40.0  | 1              | Sphingomonas sp. Ndbn-20 hits                      |
| ....Sphingomonas sp. URHD0057              | a-proteobacteria        | 40.0  | 1              | Sphingomonas sp. URHD0057 hits                     |
| ....Sphingobium sp. SYK-6                  | a-proteobacteria        | 40.0  | 2              | Sphingobium sp. SYK-6 hits                         |
| ....Sphingomonas                           | a-proteobacteria        | 39.7  | 1              | Sphingomonas hits                                  |
| ....Sphingomonas sp. Root1294              | <u>a-proteobacteria</u> | 39.7  | 1              | <u>Sphingomonas sp. Root1294 hits</u>              |
| ....Sphingomonas sp. Root50                | a-proteobacteria        | 39.7  | 1              | Sphingomonas sp. Root50 hits                       |
| ....Sphingomonas sp. Root720               | a-proteobacteria        | 39.7  | 1              | Sphingomonas sp. Root720 hits                      |
| ....Sphingomonas sp. MCT13                 | a-proteobacteria        | 39.7  | 2              | Sphingomonas sp. MCT13 hits                        |



|                                         |                         |      |          |                                                 |
|-----------------------------------------|-------------------------|------|----------|-------------------------------------------------|
| ....Sphingomonas sp. JJ-A5              | a-proteobacteria        | 39.3 | 2        | Sphingomonas sp. JJ-A5 hits                     |
| ....Sphingobium sp. EP60837             | a-proteobacteria        | 39.3 | 2        | Sphingobium sp. EP60837 hits                    |
| ....Methylocystis sp. SC2               | <u>a-proteobacteria</u> | 39.3 | <u>1</u> | <u>Methylocystis sp. SC2 hits</u>               |
| ....Sphingobium sp. Ant17               | a-proteobacteria        | 38.5 | 2        | Sphingobium sp. Ant17 hits                      |
| ....Caulobacteriales bacterium 32-69-10 | <u>a-proteobacteria</u> | 38.5 | <u>1</u> | <u>Caulobacteriales bacterium 32-69-10 hits</u> |
| ....Sphingomonas sp. 28-66-16           | a-proteobacteria        | 38.5 | 1        | Sphingomonas sp. 28-66-16 hits                  |
| ....Sphingomonas sp. UNC305MFCol5.2     | <u>a-proteobacteria</u> | 38.1 | <u>1</u> | <u>Sphingomonas sp. UNC305MFCol5.2 hits</u>     |
| ....Novosphingobium sp. MD-1            | a-proteobacteria        | 38.1 | 1        | Novosphingobium sp. MD-1 hits                   |
| ....Sphingobium sp. YR657               | a-proteobacteria        | 38.1 | 2        | Sphingobium sp. YR657 hits                      |
| ....Sphingobium yanoikuyae ATCC 51230   | <u>a-proteobacteria</u> | 38.1 | <u>1</u> | <u>Sphingobium yanoikuyae ATCC 51230 hits</u>   |
| ....Sphingobium japonicum BiD32         | <u>a-proteobacteria</u> | 37.4 | <u>1</u> | <u>Sphingobium japonicum BiD32 hits</u>         |
| ....Brevundimonas                       | a-proteobacteria        | 37.0 | 1        | Brevundimonas hits                              |
| ....Brevundimonas sp. Root1423          | a-proteobacteria        | 37.0 | 1        | Brevundimonas sp. Root1423 hits                 |
| ....Brevundimonas sp. Root608           | <u>a-proteobacteria</u> | 37.0 | <u>1</u> | <u>Brevundimonas sp. Root608 hits</u>           |
| ....Sphingomonas hengshuiensis          | a-proteobacteria        | 37.0 | 2        | Sphingomonas hengshuiensis hits                 |
| ....Sphingomonas asaccharolytica        | <u>a-proteobacteria</u> | 37.0 | <u>1</u> | <u>Sphingomonas asaccharolytica hits</u>        |
| ....Sphingomonas mali                   | a-proteobacteria        | 37.0 | 1        | Sphingomonas mali hits                          |
| ....Sphingobium sp. AP49                | <u>a-proteobacteria</u> | 36.2 | <u>2</u> | <u>Sphingobium sp. AP49 hits</u>                |
| ..Burkholderia sp. A27                  | b-proteobacteria        | 49.7 | 2        | Burkholderia sp. A27 hits                       |
| ..Paraburkholderia                      | b-proteobacteria        | 47.4 | 1        | Paraburkholderia hits                           |
| ..Paraburkholderia sediminicola         | <u>b-proteobacteria</u> | 47.4 | <u>1</u> | <u>Paraburkholderia sediminicola hits</u>       |
| ..Paraburkholderia terricola            | <u>b-proteobacteria</u> | 47.4 | <u>1</u> | <u>Paraburkholderia terricola hits</u>          |
| ..Paraburkholderia terrae               | b-proteobacteria        | 46.2 | 8        | Paraburkholderia terrae hits                    |
| ..Paraburkholderia terrae BS001         | <u>b-proteobacteria</u> | 46.6 | <u>2</u> | <u>Paraburkholderia terrae BS001 hits</u>       |
| ..Burkholderia sp. yr281                | b-proteobacteria        | 46.6 | 2        | Burkholderia sp. yr281 hits                     |
| ..Paraburkholderia monticola            | <u>b-proteobacteria</u> | 43.1 | <u>2</u> | <u>Paraburkholderia monticola hits</u>          |
| ..Mitsuaria sp. 7                       | b-proteobacteria        | 42.0 | 2        | Mitsuaria sp. 7 hits                            |
| ..Burkholderia sp. YR277                | b-proteobacteria        | 41.6 | 2        | Burkholderia sp. YR277 hits                     |
| ..Aeromonas salmonicida                 | g-proteobacteria        | 40.8 | 4        | Aeromonas salmonicida hits                      |
| ..Nitrosomonas sp. Nml66                | b-proteobacteria        | 40.8 | 2        | Nitrosomonas sp. Nml66 hits                     |
| ..Burkholderia sp. UYPR1.413            | <u>b-proteobacteria</u> | 40.8 | <u>1</u> | <u>Burkholderia sp. UYPR1.413 hits</u>          |
| ..Rhizobacter sp. Root404               | b-proteobacteria        | 40.4 | 2        | Rhizobacter sp. Root404 hits                    |
| ..Roseateles depolymerans               | b-proteobacteria        | 39.7 | 2        | Roseateles depolymerans hits                    |
| ..Ramlibacter sp. Leaf400               | b-proteobacteria        | 39.3 | 2        | Ramlibacter sp. Leaf400 hits                    |
| ..Rhizobacter sp. OV335                 | b-proteobacteria        | 38.5 | 2        | Rhizobacter sp. OV335 hits                      |
| ..Mitsuaria sp. HZ7                     | <u>b-proteobacteria</u> | 37.7 | <u>2</u> | <u>Mitsuaria sp. HZ7 hits</u>                   |
| ..Cellvibrio sp. BR                     | g-proteobacteria        | 37.0 | 2        | Cellvibrio sp. BR hits                          |
| ..Roseateles terrae                     | b-proteobacteria        | 36.6 | 2        | Roseateles terrae hits                          |
| ..Streptomyces sp. F-3                  | high GC Gram+           | 40.4 | 2        | Streptomyces sp. F-3 hits                       |
| ..Actinomadura rubrobrunea              | high GC Gram+           | 40.0 | 1        | Actinomadura rubrobrunea hits                   |
| ..Phormidium ambiguum                   | <u>cyanobacteria</u>    | 39.7 | <u>1</u> | <u>Phormidium ambiguum hits</u>                 |
| ..Phormidium ambiguum IAM M-71          | <u>cyanobacteria</u>    | 39.7 | <u>1</u> | <u>Phormidium ambiguum IAM M-71 hits</u>        |
| ..Streptomyces sp. TP-A0356             | high GC Gram+           | 39.7 | 1        | Streptomyces sp. TP-A0356 hits                  |
| ..Streptomyces sp. e14                  | high GC Gram+           | 39.3 | 1        | Streptomyces sp. e14 hits                       |
| ..Oscillatoria sp. PCC 10802            | <u>cyanobacteria</u>    | 38.1 | <u>1</u> | <u>Oscillatoria sp. PCC 10802 hits</u>          |
| ..Chloroflexi bacterium 54-19           | <u>GNS bacteria</u>     | 38.5 | <u>1</u> | <u>Chloroflexi bacterium 54-19 hits</u>         |
| ..Nocardia africana                     | high GC Gram+           | 37.7 | 1        | Nocardia africana hits                          |
| ..Cyanotheca sp. PCC 7822               | cyanobacteria           | 37.4 | 2        | Cyanotheca sp. PCC 7822 hits                    |
| ..Micromonospora echinaurantiaca        | <u>high GC Gram+</u>    | 36.2 | <u>2</u> | <u>Micromonospora echinaurantiaca hits</u>      |
| ..Streptomyces alni                     | high GC Gram+           | 36.2 | 2        | Streptomyces alni hits                          |
| ..Gonium pectorale                      | green algae             | 47.4 | 1        | Gonium pectorale hits                           |
| ..Monoraphidium neglectum               | green algae             | 46.2 | 2        | Monoraphidium neglectum hits                    |
| ..Phlebia centrifuga                    | <u>basidiomycetes</u>   | 41.2 | <u>1</u> | <u>Phlebia centrifuga hits</u>                  |
| ..Sphaerobolus stellatus SS14           | <u>basidiomycetes</u>   | 40.4 | <u>1</u> | <u>Sphaerobolus stellatus SS14 hits</u>         |
| ..Rhizopagus irregularis DAOM 181602    | <u>glomeromycetes</u>   | 38.5 | <u>1</u> | <u>Rhizopagus irregularis DAOM 181602 hits</u>  |
| ..Rhizopagus irregularis DAOM 197198w   | <u>glomeromycetes</u>   | 38.5 | <u>1</u> | <u>Rhizopagus irregularis DAOM 197198w hits</u> |
| ..Gonapodya prolifera JEL478            | monoblepharidomycetes   | 37.7 | 1        | Gonapodya prolifera JEL478 hits                 |

**Supplementary Note 1.** With Hr protein sequences from various nonvascular plants and green algae as query, the only two hits from seed plants in the NCBI nucleotide sequence database belong to *Quercus suber* (Fagaceae). These two hits were located on two separate scaffolds of the unpublished draft genome sequence of this species, and they share 88% protein sequence identity. Both sequences are significantly more similar to fungal homologs than to other green plant sequences (up to 68% protein sequence identities with fungi versus 36-37% with the seedless vascular plant *Selaginella moellendorffii*). It is unclear whether these two sequences are derived from sequencing contamination or horizontal gene transfer.

The many hemerythrin hits from flowering plants raises a significant concern about contamination in 1KP data. Other than chlorophycean sequences, which can be verified through the scaffold information of their complete genomes, other algal sequences are only sporadically found in various lineages, including red algae (*Glaucosphaera vacuolata*, 1KP IDs: RSOF\_scaffold\_2008604, RSOF\_scaffold\_2041944, RSOF\_scaffold\_2004035, RSOF\_scaffold\_2032925), glaucophytes (*Glaucocystis nostochinearum*, 1KP IDs: POOW\_scaffold\_2004542, POOW\_scaffold\_2053347) and charophytes (*Hormidiella sp.*, 1KP IDs: ISGT-scaffold\_2038756, ISGT-scaffold\_2001291; *Coleochaete irregulares*, 1KP IDs: QPDY-scaffold\_2002876, QPDY-scaffold\_2002877), and other chlorophytes (*Chlorella* 1KP ID: MWAN\_scaffold\_2004366; *Parachlorella kessleri*, 1KP ID: AKCR\_scaffold\_2002030; *Ignatius tetrasporus*, 1KP ID: KADG\_scaffold\_2037975; *Botryococcus sudeticus*, 1KP ID: VJDZ\_scaffold\_2007822). Because the 1KP database only contains plant sequence data, we further searched the *nr* database using the above sequences as query to investigate whether they were indeed similar to chlorophycean and land plant hemerythrins. These analyses showed that the red algal sequences were significantly more similar to fungal homologs than to chlorophycean and land plant sequences. Not hits to red algae were identified, even though multiple red algal genomes (e.g., *Cyanodioschizon merolae*, *Chondrus crispus*, *Galdieria sulphuraria*, *Porphyridium purpureum*, *Porphyra umbilicalis*, and *Pyropia yezoensis*) have been sequenced and deposited in NCBI. Similarly, the glaucophytes were significantly more similar to fungal and

bacterial sequences than to chlorophycean and land plant sequences (in both sequence coverage and identity).

Of the four charophyte sequences, three (1KP IDs: ISGT-scaffold\_2038756, QPDY-scaffold\_2002876 and QPDY-scaffold\_2002877) shared higher or similar percent identities with bacterial and fungal homologs (see **Supplementary Table 2** above), and one (1KP ID: ISGT-scaffold\_2001291) was slightly more similar to chlorophycean sequences. Although many other green algae outside Chlorophyceae (e.g., the charophyte *Klebsormidium nitens*, chlorophytes *Ostreococcus tauri*, *Ostreococcus lucimarinus*, *Micromonas pusilla*, *Cymbomonas tetramitiformis*, *Coccomyxa subellipsoidea*, *Chlorella variabilis*, *Chlorella vulgaris*, *Auxenochlorella protothecoides*, *Picochlorum sp.*, *Helicosporidium sp.*) have been sequenced and their data have been deposited in NCBI, no hits from these taxa were detected. Except for *Parachlorella kessleri*, all other chlorophyte sequences also shared a higher sequence coverage and identity with bacterial or fungal homologs, and again no hits from green algae outside Chlorophyceae were detected. The *Parachlorella kessleri* sequence was more similar to a protein sequence of *Chlorella variabilis* that was translated from mRNA data (NCBI accession number: XP\_005847154), which in turn was more similar to fungal and bacterial sequences.

**Supplementary Note 2.** We searched the *Nitella hyalina* transcriptomic data at NCBI (<https://trace.ncbi.nlm.nih.gov/Traces/sra/?run=SRR064326>), but only two matches of 19-32 nucleotides were found; these two matches were mapped onto different regions (separated by about 470 nucleotides) of the *Hr* CDS (see figure below, top panel). Search of the transcriptomic data of the charophyte [Closterium peracerosum-strigosum-littorale complex](https://www.ncbi.nlm.nih.gov/bioproject?term=PRJNA296352) at NCBI (<https://www.ncbi.nlm.nih.gov/bioproject?term=PRJNA296352>) provided a similar result (also see below, lower panel).

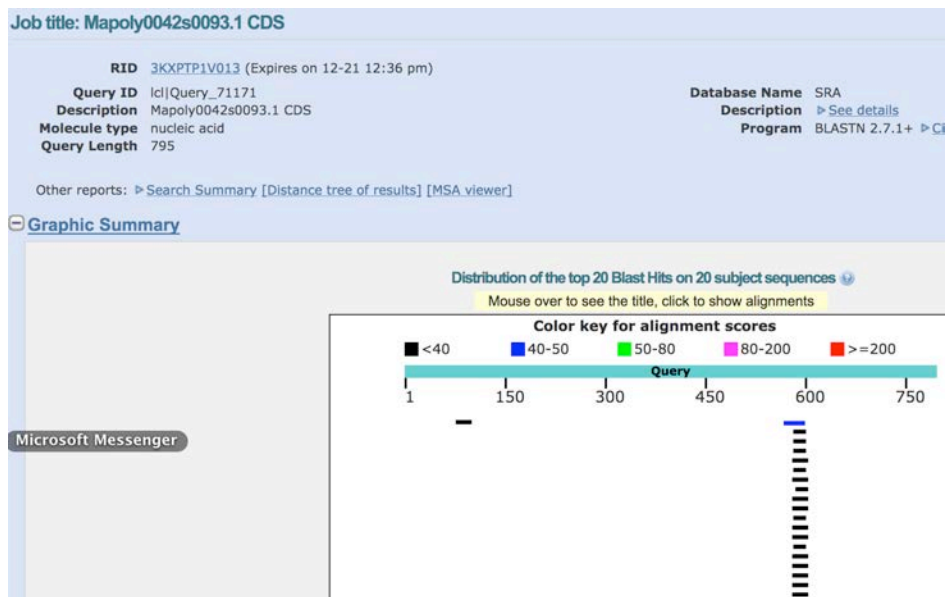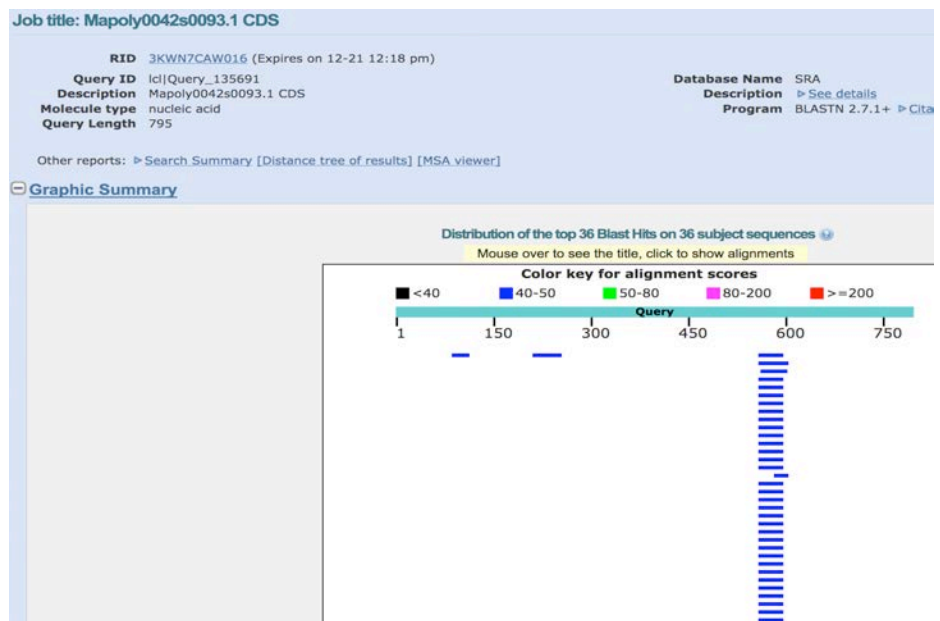

BLASTN search of transcriptomic data of charophytes *Nitella hyalina* (top panel) and *Closterium peracerosum-strigosum-littorale* complex (lower panel) at NCBI. Query is the CDS of *Marchantia polymorpha Hr* (JGI Id: Mapoly0042s0093). Results indicate that only short fragments are mapped to the query.

Because the assessment of sequence homology is more difficult at the level of nucleotide sequences, lack of sufficient coverage to the query in the above search does not necessarily suggest the absence of *Hr* in the two charophytes. Therefore, we further investigated whether the 2-3 charophyte hits were specific to *Hr* (i.e., the HHE domain). To this end, we performed the BLASTN search of NCBI non-redundant nucleotide sequence database (nt) using the same *Marchantia polymorpha Hr* (JGI Id: Mapoly0042s0093) as query. Indeed, the results included hits corresponding to those from the two charophytes (*Nitella hyalina* and *Closterium peracerosum-strigosum-littorale* complex) (see figure below, top panel). However, further inspections of these hits indicated that they were not particular to the *Hr* gene. For instance, the hits to the 670-600 bp region of the query were annotated as part of the genes encoding small integral membrane protein 10-like protein 2A, peroxidase 7-like protein, and myomegalin-like protein; they were found in both flowering plants (*Lupinus angustifolius*, *Vitis venifera*, and *Cucurbita maxima*) and animals (*Crocodylus porosus*, *Oncorhynchus mykiss*, and *Columba livia*). Similarly, hits to the 150-200 bp region of the query were annotated as genes encoding erythrocyte membrane protein, RP1 like 1 (rp111) protein, and retrotransposon Gag like 5 (Rtl5) protein; they could be found in animals (e.g., *Oryzias latipes*, *Heterocephalus glaber*, *Labrus bergylta*) and apicomplexan parasites (*Plasmodium falciparum*). On the other hand, the most significant hits, which also had the longest query coverages, were from *Selaginella moellendorffii*, the fungus *Fusarium verticillioides* and *Physcomitrella patens* (see figure below, lower panel). The former two were part of the *Hr* gene, whereas the later (i.e. *P. patens*) evolved directly from *Hr*. These data suggest that the hits from the two charophytes (*Nitella hyalina* and *Closterium peracerosum-strigosum-littorale* complex) might be associated with genes other than *Hr*.

**Job title: Mapoly0042s0093.1 CDS**

**RID** [3MTGYX9M015](#) (Expires on 12-21 20:31 pm)  
**Query ID** Icl|Query\_54899  
**Description** Mapoly0042s0093.1 CDS  
**Molecule type** nucleic acid  
**Query Length** 795

**Database Name** nr  
**Description** Nucleotide collection (nt)  
**Program** BLASTN 2.7.1+ [Citation](#)

Other reports: [Search Summary](#) [Taxonomy reports](#) [Distance tree of results](#) [MSA viewer](#)

**Graphic Summary**

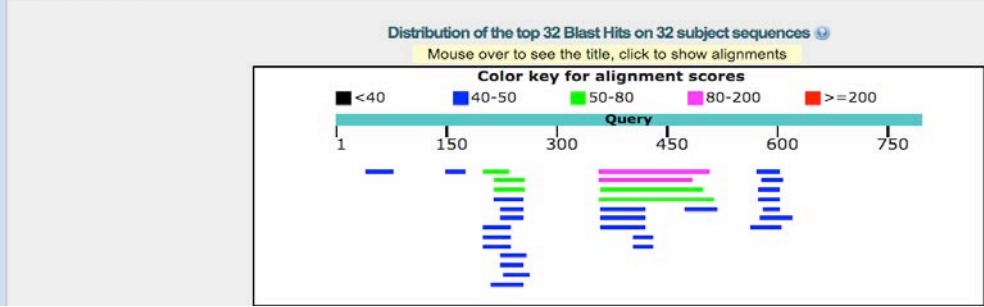

[Alignments](#) [Download](#) [GenBank](#) [Graphics](#) [Distance tree of results](#)

| Description                                                                                                | Max score | Total score | Query cover | E value | Ident | Accession                      |
|------------------------------------------------------------------------------------------------------------|-----------|-------------|-------------|---------|-------|--------------------------------|
| <a href="#">Selaginella moellendorffii hypothetical protein partial mRNA</a>                               | 123       | 123         | 18%         | 6e-24   | 78%   | <a href="#">XM_002981430.1</a> |
| <a href="#">Selaginella moellendorffii hypothetical protein partial mRNA</a>                               | 116       | 116         | 15%         | 9e-22   | 80%   | <a href="#">XM_002969959.1</a> |
| <a href="#">Fusarium verticillioides 7600 hypothetical protein (FVEG_10078), partial mRNA</a>              | 53.6      | 53.6        | 17%         | 0.009   | 68%   | <a href="#">XM_018899141.1</a> |
| <a href="#">Phycomitrella patens subsp. patens predicted protein (PHYPADRAFT_151693) mRNA, partial cds</a> | 53.6      | 53.6        | 19%         | 0.009   | 68%   | <a href="#">XM_001782780.1</a> |

The following includes uncropped gel images for corresponding Supplementary Figures above.

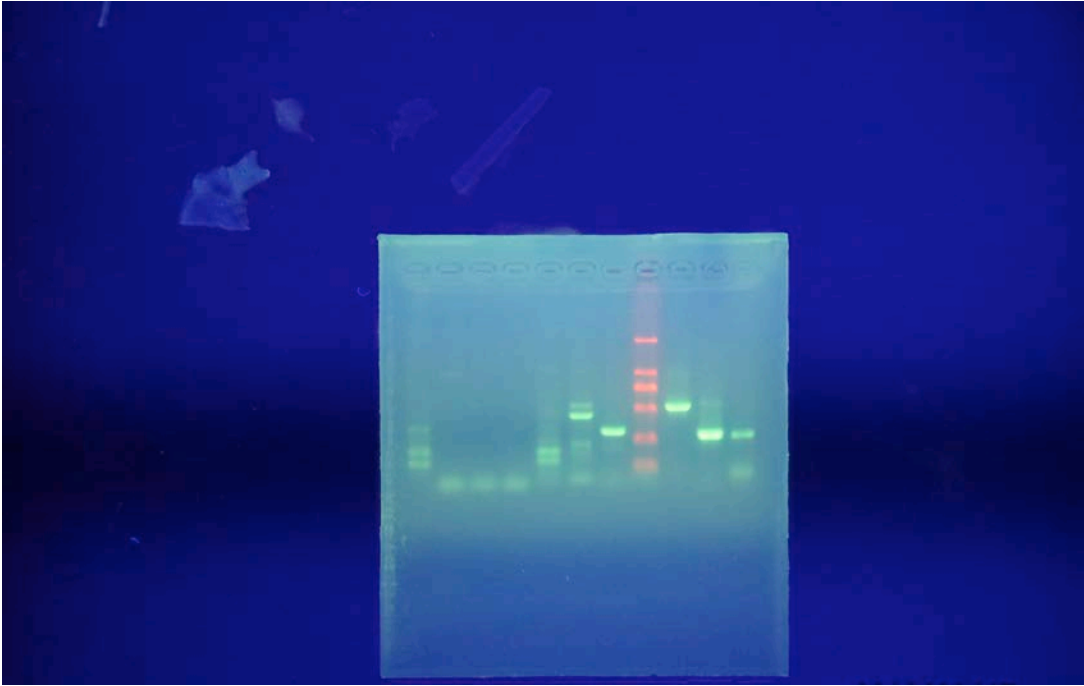

Uncropped gel of supplementary figure 6b

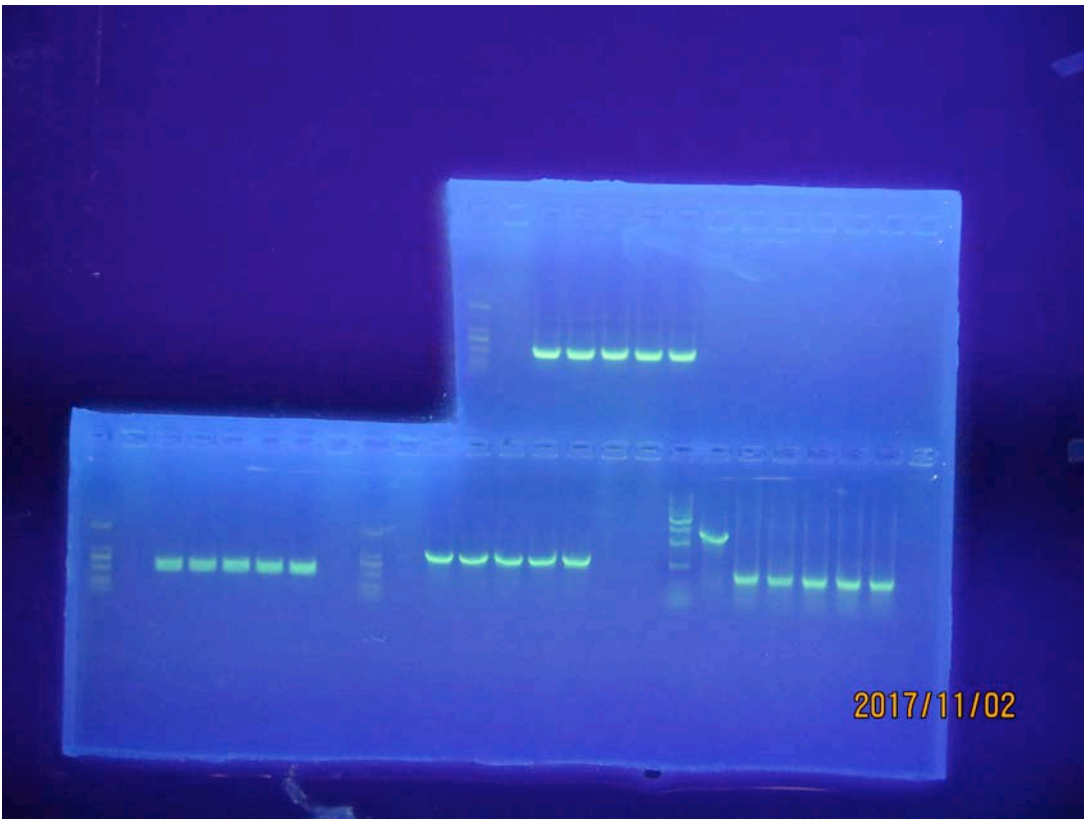

Uncropped gel of supplementary figure 10b

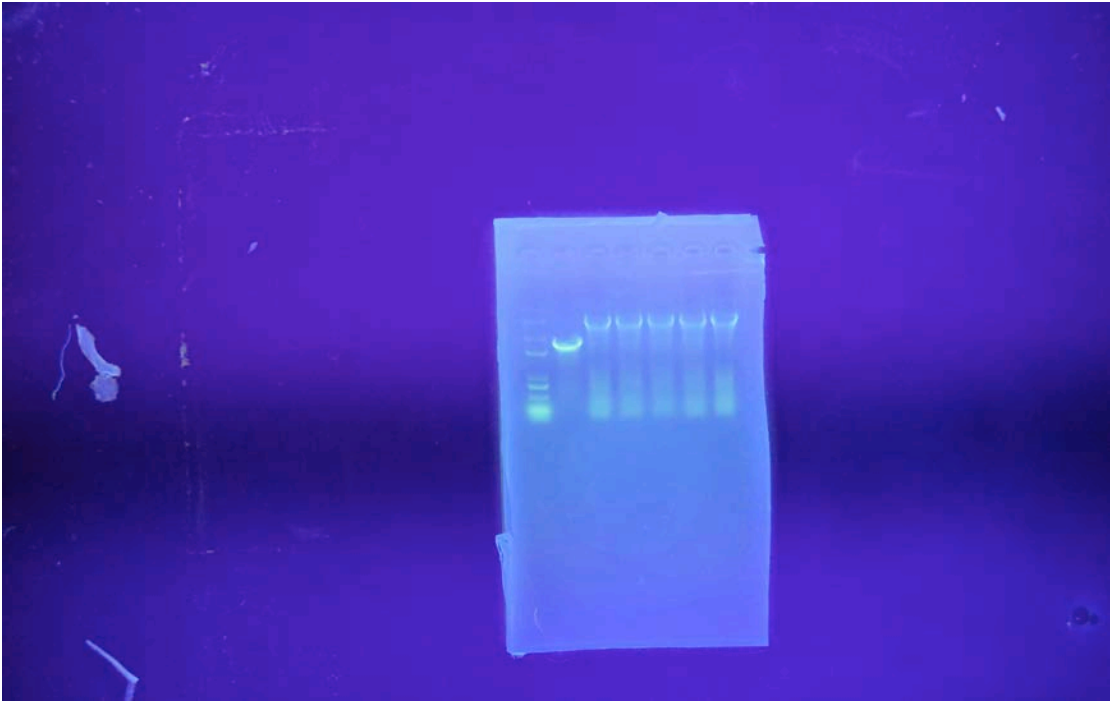

Uncropped gel of supplementary figure 10b



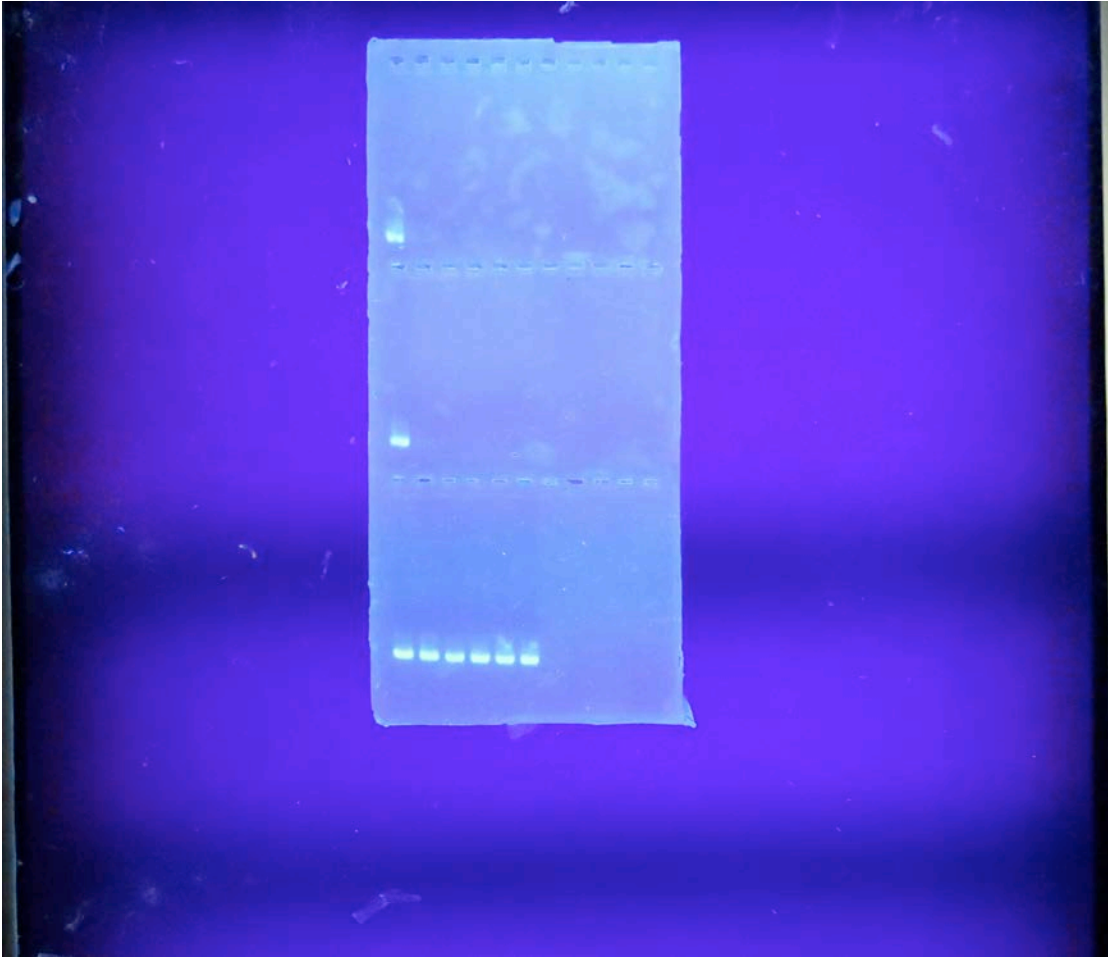

Uncropped gel of supplementary figure 10c

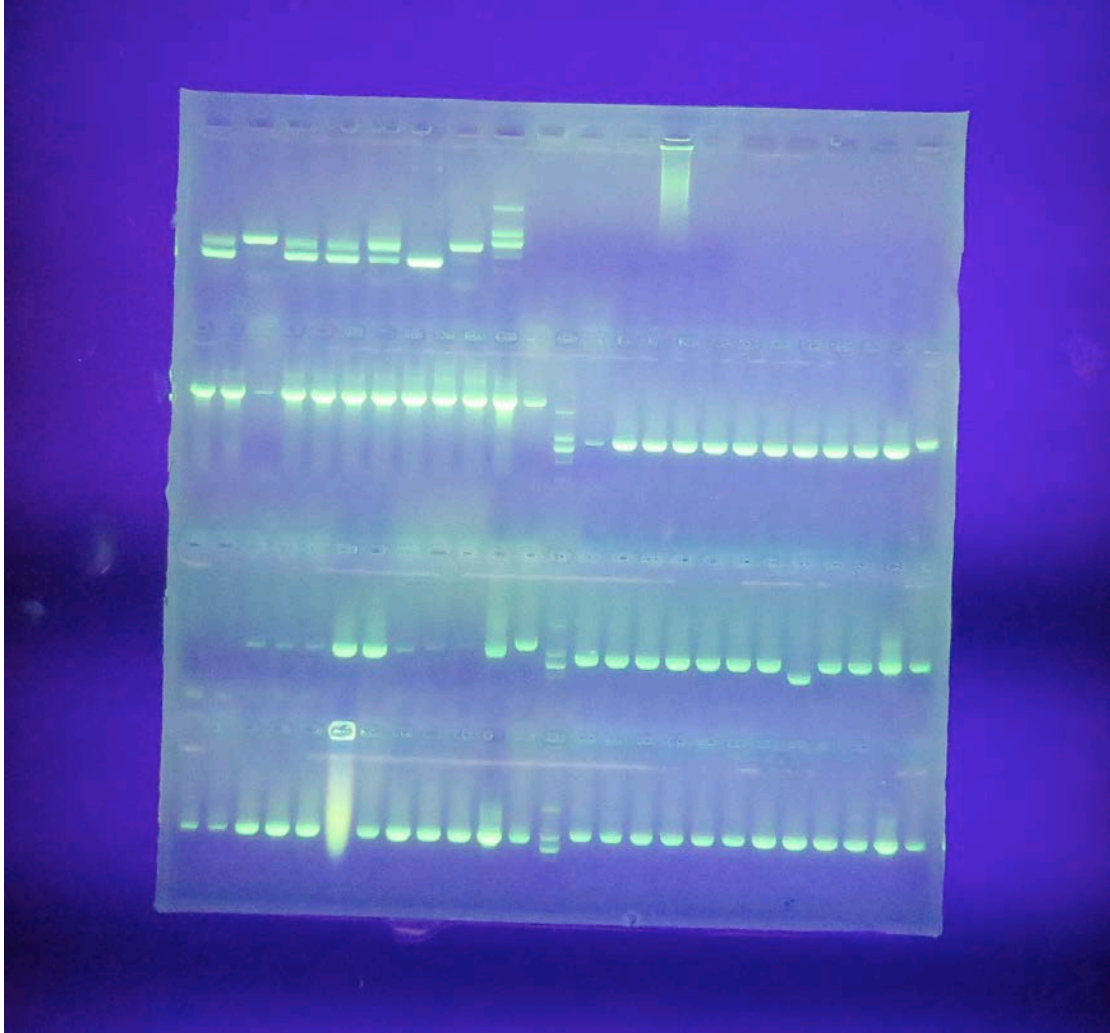

Uncropped gel of supplementary figure 13a

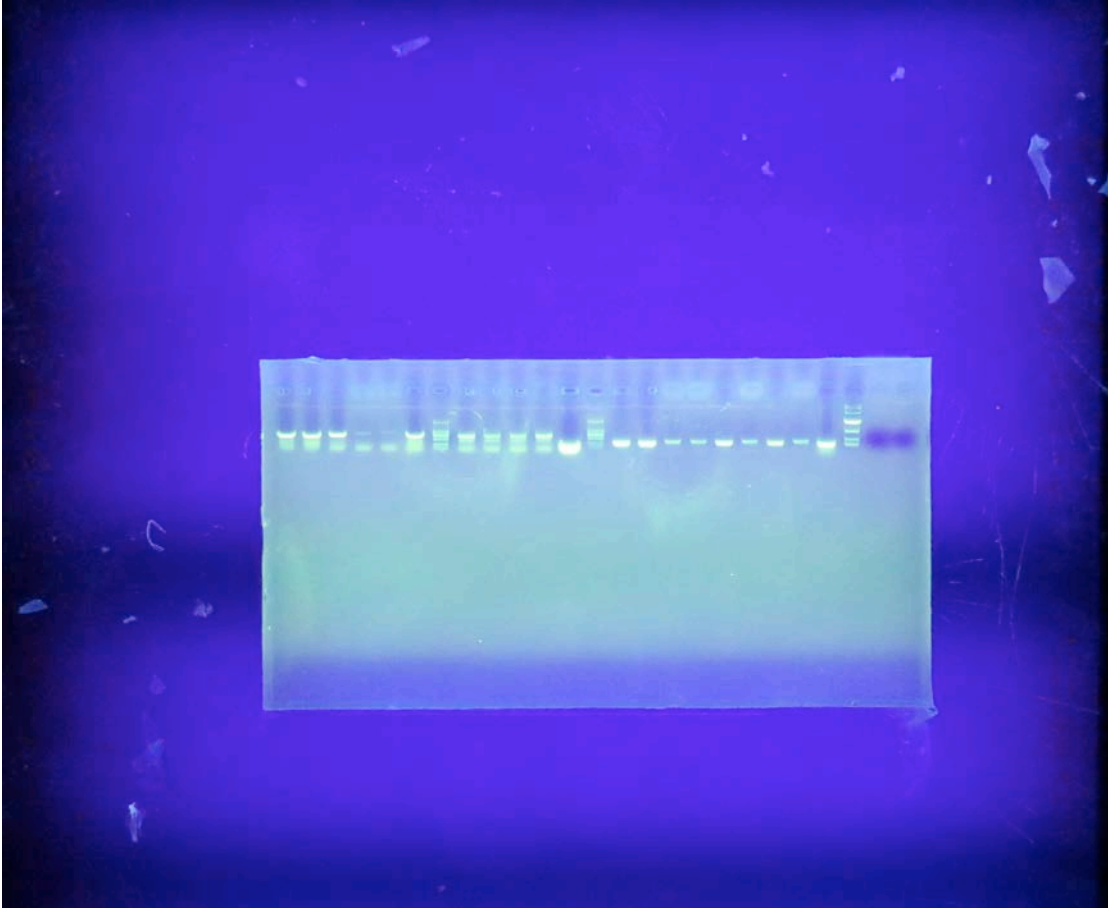

Uncropped gel of supplementary figure 13a
